# 1 **Markers of BRCAness in breast cancer**

Weston R. Bodily<sup>1</sup>, Brian H. Shirts<sup>2</sup>, Tom Walsh<sup>3,4</sup>, Suleyman Gulsuner<sup>3,4</sup>, Mary-Claire King<sup>3,4</sup>,

2 Alyssa Parker<sup>1</sup>, Moom Roosan<sup>5</sup>, Stephen R. Piccolo<sup>1,\*</sup>

3 1 - Department of Biology, Brigham Young University, Provo, UT, USA

4 2 - Department of Laboratory Medicine, University of Washington, Seattle, Washington, USA

5 3 - Division of Medical Genetics, Department of Medicine, University of Washington, Seattle, Washington,  
6 USA

7 4 - Department of Genome Sciences, University of Washington, Seattle, Washington, USA

8 5 - Pharmacy Practice Department, Chapman University School of Pharmacy, Irvine, CA, USA

9 \* - Please address correspondence to S.R.P. at [stephen\\_piccolo@byu.edu](mailto:stephen_piccolo@byu.edu).

## 10 **Abstract**

11 *Background:* Mutations in *BRCA1* and *BRCA2* cause deficiencies in homologous recombination repair (HR),  
12 resulting in repair of DNA double-strand breaks by the alternative non-homologous end-joining pathway,  
13 which is more error prone. HR deficiency of breast tumors is important because it is associated with better  
14 response to platinum salt therapies and to PARP inhibitors. Among other consequences of HR deficiency are  
15 characteristic somatic-mutation signatures and transcriptomic patterns. The term “BRCAness” describes  
16 tumors that harbor an HR defect but have no detectable germline mutation in *BRCA1* or *BRCA2*. A better  
17 understanding of the genes and molecular aberrations associated with BRCAness could provide mechanistic  
18 insights and guide development of targeted treatments.

19 *Methods:* Using The Cancer Genome Atlas (TCGA) genomic data from breast cancers in 1101 patients, we  
20 identified tumors with BRCAness based on somatic mutations, homozygous deletions, and hypermethylation  
21 of *BRCA1* and *BRCA2*. We then evaluated germline mutations, somatic mutations, homozygous deletions,  
22 and hypermethylation of 24 other breast-cancer predisposition genes. Using somatic-mutation signatures, we  
23 compared these groups against tumors from 44 TCGA patients with germline mutations in *BRCA1* or  
24 *BRCA2*. We also compared gene-expression profiles of tumors with BRCAness versus tumors from *BRCA1*  
25 and *BRCA2* mutation carriers. A statistical resampling approach enabled objective quantification of  
26 similarities among tumors, and dimensionality reduction enabled graphical characterizations of these  
27 relationships.

28 *Results:* Somatic-mutation signatures of tumors having a *BRCA1/BRCA2* somatic mutation, homozygous  
29 deletion, or hypermethylation ( $n = 64$ ) were markedly similar to each other and to tumors from  
30 *BRCA1/BRCA2* germline carriers ( $n = 44$ ). Furthermore, somatic-mutation signatures of tumors with  
31 germline or somatic events in *BARD1* or *RAD51C* showed high similarity to tumors from *BRCA1/BRCA2*  
32 carriers. These findings coincide with the roles of these genes in HR and support their candidacy as genes  
33 critical to BRCAness. As expected, tumors with either germline or somatic events in *BRCA1* were enriched  
34 for basal gene-expression features.

35 *Conclusions:* Somatic-mutation signatures reflect the effects of HR deficiencies in breast tumors.  
36 Somatic-mutation signatures have potential as biomarkers of treatment response and to decipher the  
37 mechanisms of HR deficiency.

38 **Keywords:** Breast cancer, mutational signature, cancer subtypes, multiomic, BRCAness, expression profiles

## 39 Introduction

40 Approximately 1-5% of breast-cancer patients carry a pathogenic germline variant in either *BRCA1* or  
41 *BRCA2*<sup>1-5</sup>. These genes play important roles in homologous recombination repair (HR) of double-stranded  
42 breaks and stalled or damaged replication forks<sup>6,7</sup>. When the *BRCA1* or *BRCA2* gene products are unable to  
43 perform HR, cells may resort to non-homologous end-joining, a less effective means of repairing  
44 double-stranded breaks, potentially leading to an increased rate of DNA mutations<sup>8-11</sup>. Patients who carry  
45 biallelic loss of *BRCA1* and *BRCA2* due to germline variants and/or somatic mutations often respond well to  
46 *poly ADP ribose polymerase* (PARP) inhibitors and platinum-salt therapies, which increase the rate of DNA  
47 damage, typically causing the cells to enter programmed cell death<sup>12-16</sup>.

48 The downstream effects of *BRCA* mutations are distinctive. For example, *BRCA1* and *BRCA2*-mutant tumors  
49 exhibit an abundance of C-to-T transitions across the genome<sup>18-20</sup>. Other downstream effects include  
50 characteristic transcriptional responses. For example, it has been shown that the “Basal” gene-expression  
51 subtype is enriched for tumors with *BRCA1* mutations<sup>21-24</sup>, that *BRCA1* mutations are commonly found in  
52 breast tumors with triple-negative hormone-receptor status<sup>25,26</sup>, and that gene-expression profiles may predict  
53 PARP inhibitor responses<sup>27</sup>. These patterns are consistently observable, even in the presence of hundreds of  
54 other mutations in the tumors<sup>24,28</sup>.

55 In 2004, Turner, et al. coined the term *BRCAness* to describe patients who do not have a pathogenic germline  
56 variant in *BRCA1* or *BRCA2* but who have developed a tumor with an impaired ability to perform HR<sup>29</sup>. This  
57 category may be useful for clinical management of patients and especially for predicting treatment  
58 responses<sup>29,30</sup>. Recent estimates suggest that the proportion of breast-cancer patients who fall into this  
59 category may be as high as 20%<sup>31</sup>. Davies, et al. demonstrated an ability to categorize patients into this  
60 category with high accuracy based on high-level mutational patterns<sup>31</sup>. Polak, et al. confirmed that somatic  
61 mutations, large deletions, and DNA hypermethylation of *BRCA1* and *BRCA2* are reliable indicators of  
62 *BRCAness*<sup>32-35</sup>. They also showed a relationship between *BRCAness* and germline mutations in *PALB2* and  
63 hypermethylation of *RAD51C*<sup>32</sup>. However, a considerable portion of breast tumors with HR deficiency lack a  
64 known driver. Furthermore, little is known about whether the downstream effects of germline variants,  
65 somatic variants, large deletions, and hypermethylation are similar to each other or whether these effects are  
66 similar for different genes.

67 An underlying assumption of the *BRCAness* concept is that the effects of HR deficiency are similar across  
68 tumors, regardless of the genes that drive those deficiencies and despite considerable variation in genetic

69 backgrounds, environmental factors, and the presence of other driver mutations. Based on this  
70 assumption—and in a quest to identify candidate markers of BRCAness—we performed a systematic  
71 evaluation of multiomic and clinical data from 1101 patients in The Cancer Genome Atlas (TCGA)<sup>24</sup>. In  
72 performing these evaluations, we characterized each tumor using two types of molecular signature: 1)  
73 weights that represent the tumor’s somatic-mutation profile and 2) mRNA expression values for genes used to  
74 assign tumors to the PAM50 subtypes<sup>36,37</sup>. In this way, we sought to characterize the effects of HR defects in  
75 a comprehensive yet clinically interpretable manner. To evaluate similarities among tumors based on these  
76 molecular profiles, we used a statistical-resampling approach designed to quantify similarities among patient  
77 subgroups, even when those subgroups are small, thus helping to account for rare events. We use *aberration*  
78 as a general term to describe germline mutations, somatic mutations, copy-number deletions, and  
79 hypermethylation events.

## 80 **Methods**

### 81 **Data preparation and filtering**

82 We obtained breast-cancer data from TCGA for 1101 patients in total. To determine germline-mutation  
83 status, we downloaded raw sequencing data from CGHub<sup>38</sup> for normal (blood) samples. We limited our  
84 analysis to whole-exome sequencing samples that had been sequenced using Illumina Genome Analyzer or  
85 HiSeq equipment. Because the sequencing data files were stored in BAM format, we used Picard Tools  
86 (SamToFastq module, version 1.131, <http://broadinstitute.github.io/picard>) to convert the files to FASTQ  
87 format. We used the Burrows-Wheeler Alignment (BWA) tool (version 0.7.12)<sup>39</sup> to align the sequencing  
88 reads to version 19 of the GENCODE reference genome (hg19 compatible)<sup>40</sup>. We used sambamba (version  
89 0.5.4)<sup>41</sup> to sort, index, mark duplicates, and flag statistics for the aligned BAM files. In cases where multiple  
90 BAM files were available for a single patient, we used bamUtil (version 1.0.13,  
91 <https://github.com/statgen/bamUtil>) to merge the BAM files. When searching for relevant germline variants,  
92 we focused on 26 genes that had been included in the BROCA Cancer Risk Panel and that had a known  
93 association with breast-cancer risk (<http://tests.labmed.washington.edu/BROCA>)<sup>42,43</sup>. We extracted data for  
94 these genes using bedtools (intersectBed module, version 2)<sup>44</sup>.

95 We used Picard Tools (CalculateHsMetrics module) to calculate alignment metrics. For exome-capture  
96 regions across all samples, the average sequencing coverage was 44.4. The average percentage of target

97 bases that achieved at least 30X coverage was 33.7%. The average percentage of target bases that achieved at  
98 least 100X coverage was 12.3%.

99 To call DNA variants, we used freebayes (version v0.9.21-18-gc15a283)<sup>45</sup> and Pindel  
100 (<https://github.com/genome/pindel>). We used freebayes to identify single-nucleotide variants (SNVs) and  
101 small insertions or deletions (indels); we used Pindel to identify medium-sized insertions and deletions.  
102 Having called these variants, we used snpEff (version 4.1)<sup>46</sup> to annotate the variants and GEMINI (version  
103 0.16.3)<sup>47</sup> to query the variant data. To expedite execution of these steps, we used the GNU Parallel  
104 software<sup>48</sup>. The scripts and code that we used to process the germline data can be found in an open-access  
105 repository: [https://bitbucket.org/srp33/tcga\\_germline/src](https://bitbucket.org/srp33/tcga_germline/src).

106 Geneticists experienced in variant interpretation (BHS, TW, SG, MCK) further filtered the germline variants  
107 for pathogenicity using available sources of information on variants, following accepted guidelines for  
108 variant classification as previously described<sup>49</sup>. Accordingly, these germline calls were independent of  
109 variant-classification calls used in prior studies of TCGA  
110 data[50;koboldtComprehensiveMolecularPortraits2012]. To assess loss of heterozygosity (LOH), we used  
111 data from Riaz, et al.<sup>51</sup>. They had made LOH calls for a large proportion of the breast-cancer patients in our  
112 study.

113 We identified somatic SNVs and indels for each patient by examining variant calls that had been made using  
114 Mutect<sup>52</sup>; these variants had been made available via the Genomic Data Commons<sup>53</sup>. We used the following  
115 criteria to exclude somatic variants: 1) synonymous variants 2) variants that snpEff classified as having a  
116 “LOW” or “MODIFIER” effect on protein sequence, 3) variants that SIFT<sup>54</sup> and Polyphen2<sup>55</sup> both suggested  
117 to be benign<sup>56</sup>, and 4) variants that were observed at greater than 1% frequency across all populations in  
118 ExAC<sup>57</sup>. For *BRCA1* and *BRCA2*, we examined candidate variants based on all available sources of evidence  
119 and the University of Washington, Department of Laboratory Medicine clinical database as described  
120 previously<sup>58</sup>. We compared our classifications to those publicly reported in the ClinVar database<sup>59</sup> when  
121 available and found complete concordance. Based on these criteria, we categorized each variant as  
122 pathogenic, likely pathogenic, variant of uncertain significance (VUS), likely benign, or benign. Then we  
123 examined the ClinVar database<sup>60</sup> for evidence that VUS or likely benign variants had been classified by  
124 others as pathogenic; however, none met this criterion. To err on the side of sensitivity, we considered any  
125 *BRCA1* and *BRCA2* mutation to be “mutated” if it fell into our pathogenic, likely pathogenic, or VUS  
126 categories.

127 Using the somatic-mutation data for each patient, we derived mutation-signature profiles using the  
128 `deconstructSigs` (version 1.8.0) R package<sup>61</sup>. As input to this process, we used somatic-variant calls that had  
129 not been filtered for pathogenicity, as a way to ensure adequate representation of each signature. The output  
130 of this process was a vector for each tumor that indicated a “weight” for each signature<sup>19</sup>. Figures S1-S2  
131 illustrate these weights for two tumors that we analyzed.

132 We downloaded DNA methylation data via the Xena Functional Genomics Explorer<sup>62</sup>. These data were  
133 generated using the Illumina HumanMethylation27 and HumanMethylation450 BeadChip platforms. For the  
134 HumanMethylation27 arrays, we mapped probes to genes using a file provided by the manufacturer  
135 (<https://www.ncbi.nlm.nih.gov/geo/query/acc.cgi?acc=GPL8490>). For the HumanMethylation450 arrays, we  
136 mapped probes to genes using an annotation file created by Price, et al.<sup>63</sup> (see  
137 <http://www.ncbi.nlm.nih.gov/geo/query/acc.cgi?acc=GPL16304>). Typically, multiple probes mapped to a  
138 given gene. Using probe-level data from *BRCA1*, *BRCA2*, *PTEN*, and *RAD51C*, we performed a preliminary  
139 analysis to determine criteria for selecting and summarizing these probe-level values. Because these genes  
140 are tumor suppressors, we started with the assumption that in most cases, the genes would be methylated at  
141 low levels. We also assumed that probes nearest the transcription start sites would be most informative. Upon  
142 plotting the data (Figure S3), we decided to limit our analysis to probes that mapped to the genome within  
143 300 nucleotides of each gene’s transcription start site. In some cases, probes appeared to be faulty because  
144 they showed considerably different methylation levels (“beta” values) than other probes in the region (Figure  
145 S3). To mitigate the effects of these outliers, we calculated gene-level methylation values as the median beta  
146 value across any remaining probes for that gene. Then, to identify tumors that exhibited relatively high beta  
147 values—and thus could be considered to be *hypermethylated*—we used the `getOutliersII` function in the  
148 `extremevalues` R package (version 2.3.2)<sup>64</sup> to detect outliers. When invoking this function, we specified the  
149 following non-default parameter values: `distribution = "exponential"`, `alpha = c(0.000001,`  
150 `0.000001)`.

151 We downloaded copy-number-variation data from the Xena Functional Genomics Explorer<sup>62</sup>. These data had  
152 been generated using Affymetrix SNP 6.0 arrays; CNV calls had been made using the GISTIC2 method<sup>65</sup>.  
153 The CNV calls had also been summarized to gene-level values using integer-based discretization. We  
154 focused on tumors with a gene count of “-2”, which indicates a homozygous deletion.

155 We used RNA-Sequencing data that had been aligned and summarized to gene-level values using the original  
156 TCGA pipeline<sup>24</sup>. To facilitate biological and clinical interpretation, we limited the gene-expression data to  
157 The Prosigna™ Breast Cancer Prognostic Gene Signature (PAM50) genes<sup>66</sup>. Netanel, et al. had previously

158 published PAM50 subtypes for TCGA breast cancer samples; we reused this information in our study<sup>67</sup>. For  
159 each of these genes, we also sought to identify tumors with unusually low expression levels. To do this, we  
160 used the *getOutliersI* function in the *extremevalues* package to identify outliers. We used the following  
161 non-default parameter values: `alpha = c(0.000001, 0.000001)`, `distribution = "lognormal"`,  
162 `FLim = c(0.1, 0.9)`.

163 We parsed demographic, histopathological, and surgical variables for TCGA samples from the repository  
164 prepared by Rahman, et al.<sup>68</sup>. We obtained drug-response data from the TCGA legacy archive  
165 (<https://portal.gdc.cancer.gov/legacy-archive>) and standardized drug names using synonyms from the  
166 National Cancer Institute Thesaurus<sup>69</sup>.

## 167 **Quantitative analysis and visualization**

168 To prepare, analyze, and visualize the data, we wrote computer scripts in the R programming language<sup>70</sup>. In  
169 writing these scripts, we used the following packages: `readr`<sup>71</sup>, `dplyr`<sup>72</sup>, `ggplot2`<sup>73</sup>, `tidyr`<sup>74</sup>, `reshape2`<sup>75</sup>,  
170 `ggrepel`<sup>76</sup>, `cowplot`<sup>77</sup>, `data.table`<sup>78</sup>, `UpSetR`<sup>79</sup>, `BSgenome.Hsapiens.UCSC.hg38`<sup>80,81</sup>, and `Rtsne`<sup>82</sup>. We  
171 created a series of R scripts that execute all steps of our analysis and generate the figures in this paper; these  
172 documents are available at <https://osf.io/9jhr2>.

173 To reduce data dimensionality for visualization purposes, we applied the Barnes-Hut t-distributed Stochastic  
174 Neighbor Embedding (t-SNE) algorithm<sup>83,84</sup> to the mutation signatures and PAM50 expression profiles. This  
175 reduced the data to two dimensions, which we plotted as Cartesian coordinates. To quantify homogeneity  
176 within a group of tumors that harbored a particular aberration, we calculated the pairwise Euclidean distance  
177 between each patient pair in the group and then calculated the median pairwise distance<sup>85</sup>. When comparing  
178 two groups, we used a similar approach but instead calculated the median distance between each pair of  
179 individuals in either group. To determine whether the similarity within or between groups was statistically  
180 significant, we used a permutation approach. We randomized the patient identifiers, calculated the median  
181 pairwise distance within (or between) groups, and repeated these steps 10,000 times. This process resulted in  
182 an empirical null distribution against which we compared the actual median distance. We then derived  
183 empirical p-values by calculating the proportion of randomized median distances that were larger than the  
184 actual median distance.



## 185 Results

186 We used clinical and molecular data from breast-cancer patients in TCGA to evaluate the downstream effects  
187 of *BRCA1* and *BRCA2* germline mutations. We evaluated two types of downstream effect: 1) expression  
188 levels of genes that are used to classify tumors into the PAM50 subtypes<sup>36,37</sup> and 2) signatures that reflect a  
189 tumor's overall somatic-mutation profile in a trinucleotide context<sup>18,19</sup>. We used expression data for the  
190 PAM50 genes due to their biological and clinical relevance. We used somatic-mutation signatures because  
191 they reflect the genomic effects of HR defects and have been associated with *BRCA1/BRCA2* mutation  
192 status<sup>18,19</sup>. First, we assessed whether either of these profile types are more homogeneous in *BRCA1/BRCA2*  
193 germline carriers than in randomly selected patients. Next we evaluated the robustness of potential criteria  
194 for classifying tumors into the “BRCAness” category. These criteria included somatic mutations,  
195 homozygous deletions, and DNA hypermethylation of *BRCA1* and *BRCA2*. Similarly, we assessed whether  
196 these types of aberration in 24 other breast-cancer predisposition genes have similar effects to  
197 *BRCA1/BRCA2* aberrations. Before classifying any gene as a candidate BRCAness gene, we required that the  
198 effects of these aberrations be consistent across multiple aberration types.

199 Of 993 breast-cancer patients with available germline data, 22 harbored a pathogenic SNV or indel in  
200 *BRCA1*; 22 harbored a *BRCA2* variant (Figure 1A). All but 3 *BRCA1* carriers and all but 7 *BRCA2* carriers  
201 experienced loss of heterozygosity (LOH) in the same gene (Figures S4-S5). *BRCA1* carriers fell into the  
202 “Basal” (n = 17); Her2 (n = 1), Luminal A (n = 2), and Luminal B (n = 1) gene-expression subtypes (Figure  
203 S6)<sup>21,36,37</sup>. Most *BRCA2* carriers fell into the Luminal A subtype (n = 13); the remaining individuals were  
204 dispersed across the other subtypes. As demonstrated previously<sup>19</sup>, the primary somatic-mutation signature  
205 for most *BRCA1* and *BRCA2* carriers was “Signature 3”; however, other signatures (especially 1A) were also  
206 common (Figure S7). Figure S8 shows the overlap between these two types of molecular profile.

207 Although it is useful to evaluate breast-cancer patients based on the *primary* subtype or signature associated  
208 with each tumor, tumors are aggregates of multiple subtypes and signatures. To account for this diversity, we  
209 characterized tumors based on 1) gene-expression levels for all available PAM50 genes and 2) all 27  
210 somatic-mutation signatures. To enable visualization of these profiles, we used the t-SNE technique to reduce  
211 the dimensionality of these profiles. Generally, tumors with the same *primary* subtype or signature clustered  
212 together in these visualizations (Figures 2-3); however, in some cases, this did not happen. For example, the  
213 dimensionally reduced gene-expression profiles for Basal tumors formed a tight, distinct cluster (Figure ??).  
214 But some Basal tumors were distant from this cluster, and one “Normal-like” tumor was located in this



215 cluster. Similarly, tumors assigned to somatic-mutation “Signature 3” formed a cohesive cluster (Figure 3),  
216 but some “Signature 3” tumors were separate. These observations highlight the importance of evaluating  
217 molecular profiles as a whole, not just using a single, primary category.

218 Under the assumption that *BRCA1/BRCA2* germline variants exhibit recognizable effects on tumor  
219 transcription, we used a statistical-resampling approach (see Methods) to evaluate whether tumors from  
220 *BRCA1* carriers have homogeneous gene-expression profiles. As expected based on the tumors’ primary  
221 PAM50 classifications, 18 of 22 *BRCA1* carriers overlapped closely with the Basal subtype (Figure 4A). But  
222 as a whole, the expression profiles for this group were *not* more homogeneous than expected by random  
223 chance ( $p = 0.065$ ; Figure S9A), perhaps because the 4 non-Basal samples exhibited gene-expression profiles  
224 that were vastly different from the Basal tumors. Similarly, *BRCA2* carriers were *not* significantly  
225 homogeneous ( $p = 0.16$ ; Figure S9B); tumors from these individuals were dispersed across the  
226 gene-expression topography (Figure 4B). In contrast, somatic-mutation signatures of *BRCA1* germline  
227 carriers were *more* homogeneous than expected by chance ( $p = 0.0004$ ; Figures 5A and S10A), as were those  
228 from *BRCA2* carriers ( $p = 0.0034$ ; Figures 5B and S10B). None of the three *BRCA1* carriers who lacked  
229 LOH events clustered closely with the remaining *BRCA1* tumors (Figure 5A). Of the 7 *BRCA2* tumors  
230 without detected LOH events, 4 were among those that failed to cluster closely with the remaining *BRCA2*  
231 tumors (Figure 5B). These observations confirm that germline *BRCA1/BRCA2* mutations leave a  
232 recognizable imprint on a tumor’s mutational landscape but that this imprint is more likely in combination  
233 with a second “hit” in the same gene<sup>19,32,86</sup>.

234 Next we evaluated similarities between *BRCA1* and *BRCA2* germline carriers. Although some *BRCA2*  
235 carriers fell into the Basal gene-expression subtype, overall profiles for these patients were dissimilar to those  
236 from *BRCA1* carriers ( $p = 0.99$ ; Figures 4A-B and S11A). However, the opposite held true for  
237 somatic-mutation signatures: tumors from *BRCA1* and *BRCA2* carriers were highly similar to each other ( $p =$   
238  $0.0001$ ; Figures 5A-B and S12A).

239 A somatic mutation, homozygous deletion, or DNA hypermethylation occurred in *BRCA1* and *BRCA2* for 64  
240 patients (Figure 1B-D). Most of these events were mutually exclusive with each other and with germline  
241 variants (Figure S13). Whether for PAM50 subtypes or somatic-mutation signatures, tumors with *BRCA1*  
242 hypermethylation were relatively homogeneous and highly similar to tumors from *BRCA1* germline carriers  
243 (Figures 4G, 5G, S9G, S10G; Table 1). For PAM50 gene expression, no other aberration type showed  
244 significant similarity to *BRCA1* germline mutations. Somatic-mutation signatures from tumors with *BRCA1*  
245 somatic mutations or homozygous deletions were significantly similar to those from *BRCA1* germline

246 mutations (Table 1). Only 2 tumors had *BRCA2* hypermethylation, but the mutational signatures for these  
247 samples were significantly similar to tumors from *BRCA2* germline carriers ( $p = 0.0014$ ; Figure 5H).  
248 Likewise, *BRCA2* somatic mutations and homozygous deletions produced mutational signatures that were  
249 similar to germline *BRCA2* carriers (Table 1; Figures 5D and 5F). Based on these findings, we conclude that  
250 disruptions of *BRCA1* and *BRCA2* exert similar effects on somatic-mutation signatures—but not PAM50  
251 gene expression—whether those disruptions originate in the germline or via somatic processes. To provide  
252 further evidence, we aggregated all patients who had any type of *BRCA1* or *BRCA2* aberration into a  
253 *BRCAness reference group*. As a whole, mutational signatures for this group were much more homogeneous  
254 than expected by chance ( $p = 0.0001$ ; Figure S14). We used this reference group to evaluate other criteria  
255 that might classify patients into the BRCAness category. For our remaining evaluations, we used  
256 somatic-mutation signatures—rather than PAM50 gene expression—for these assessments because they  
257 coincided so consistently with BRCA aberration status, in line with the definition of BRCAness as an HR  
258 defect<sup>30</sup>.

259 We examined data for 24 additional breast-cancer predisposition genes and evaluated whether molecular  
260 aberrations in these genes result in mutational signatures that are similar to our BRCAness reference group.  
261 We found pathogenic and likely pathogenic germline mutations in 15 genes. The most frequently mutated  
262 were *CHEK2*, *ATM*, and *NBN* (Figures S15 and S16). We found potentially pathogenic somatic mutations in  
263 all 24 genes, most frequently in *TP53*, *CDH1*, and *PTEN* (Figures S17 and S18). Homozygous deletions  
264 occurred most frequently in *PTEN*, *CDH1*, and *CHEK1* (Figures S19 and S20). Finally, 5 genes were  
265 hypermethylated (Figures S21 and S22). Typically, these events were rare for a given gene. Using our  
266 resampling approach, we compared each aberration type in each gene against the BRCAness reference group.  
267 In cases where an aberration overlapped between the reference and comparison groups, we removed  
268 individuals who harbored that aberration. For 8 genes, at least one type of aberration attained statistical  
269 significance (Table 2). A total of 8 aberrations occurred in *BARD1* across 3 categories of aberration; all 3  
270 categories were statistically significant (Table 2). *RAD51C* homozygous deletions ( $n = 2$ ) and  
271 hypermethylation ( $n = 32$ ) attained significance, but germline mutations ( $n = 1$ ) and somatic mutations ( $n =$   
272  $3$ ) did not. *TP53* homozygous deletions ( $n = 15$ ) were significant, but somatic mutations ( $n = 302$ ) and  
273 germline mutations ( $n = 2$ ) were not.

274 Lastly, we evaluated the following types of data for candidacy as BRCAness markers: 1) unusually low  
275 mRNA expression, 2) demographic, histopathological, and surgical observations, and 3) patient drug  
276 responses. First, we calculated the median Euclidean distance—based on somatic-mutation

277 signatures—between each patient and the BRCAness reference group. Then we used a two-sided Pearson  
278 correlation test to assess the relationship between these median distances and each candidate variable. In  
279 determining whether a tumor exhibited unusually low mRNA expression for a given gene, we used an  
280 outlier-detection technique (see Methods). Unusually low expression of *RAD51C* ( $\rho = 0.29$ ,  $p = 4.9e-6$ )  
281 and *BRCA1* ( $\rho = 0.26$ ,  $p = 4.2e-5$ ) showed the strongest positive correlation with the reference group,  
282 whereas *BARD1* ( $\rho = -0.28$ ,  $p = 8.5e-5$ ) and *CDH1* ( $\rho = -0.28$ ,  $p = 8.5e-4$ ) showed the strongest negative  
283 correlation (Figures S23 and 6). Triple-negative status, infiltrating ductal carcinoma histology, and close  
284 surgical margins were the most positively associated clinical variables (Figure S24). No chemotherapy  
285 treatment was significantly associated with BRCAness, though sample size ( $n = 211$ ) was relatively small for  
286 the drug data (Figure S25).

## 287 Discussion

288 By definition, BRCAness tumors have HR defects<sup>29</sup>. As with germline mutations in *BRCA1* and *BRCA2*,  
289 these deficiencies could be exploited therapeutically<sup>15–17,87,88</sup>. Various criteria have been proposed as  
290 indicators of BRCAness, including triple-negative hormone-receptor status<sup>89</sup>, somatic mutations in *BRCA1*,  
291 hypermethylation of *BRCA1*, germline mutations in *PALB2*, and hypermethylation of *RAD51C*<sup>32</sup>. However,  
292 relatively little has been understood about whether these aberrations are reliable indicators of BRCAness,  
293 whether these aberrations have similar downstream effects as germline *BRCA1/BRCA2* mutations, or whether  
294 aberrations in other genes in the HR pathway could be used as reliable markers of BRCAness. We evaluated  
295 these questions using a publicly available, multiomic dataset and used robust, quantitative methods to  
296 evaluate the downstream effects of these aberrations. Our permutation approach takes multiple variables  
297 (e.g. the full profile of signature weights) into account simultaneously, not just the primary subtype.  
298 Although we observed a clear relationship between germline *BRCA1* mutations and the “Basal”  
299 gene-expression subtype—which overlaps considerably with triple-negative status—we otherwise observed  
300 few consistent patterns in the gene-expression data. In contrast, we observed clear and consistent patterns for  
301 the somatic-mutation signatures. Thus we conclude that somatic-mutation signatures are more useful  
302 indicators of BRCAness than gene-expression levels.

303 Germline *BRCA1* mutations affected somatic-mutation signatures similarly to germline *BRCA2* mutations.  
304 Furthermore, somatic-mutations, homozygous deletions, and hypermethylation of *BRCA1* and *BRCA2* had  
305 downstream effects similar to germline mutations in these genes. As a whole, tumors with any

306 *BRCA1/BRCA2* aberration formed a cohesive group, against which we compared other tumors. For a gene to  
307 be considered a strong BRCAness biomarker candidate, we required that at least two types of molecular  
308 aberration show significant similarity to the BRCAness reference group, suggesting that aberrations in the  
309 gene leave a recognizable imprint on the somatic-mutation landscape. This allowed us to derive insights even  
310 though a single type of aberration may have occurred rarely in a given gene. Two genes met these criteria:  
311 *BARD1* and *RAD51C*. These genes both form a complex with *BRCA1* to help repair double-stranded breaks  
312 via homologous recombination<sup>90</sup>; both proteins are enriched in triple-negative breast tumors<sup>91,92</sup>. Our  
313 findings provide additional evidence that defects in these genes have interchangeable effects on HR and that  
314 the functional status of these genes are a reliable indicator of BRCAness. *BRCA2* interacts with *RAD51* as  
315 well as *PALB2*<sup>90</sup>.

316 Some genes showed significant similarity to the BRCAness reference group for one type of aberration only  
317 (Table 2). These included germline mutations in *PALB2* and *RAD51B*, which have a clear mechanistic link to  
318 *BRCA1* and *BRCA2*. Determining which germline mutations are pathogenic remains a challenging task, so it  
319 is possible that more- or less-stringent filtering of candidate aberrations would lead to more consistent results.  
320 In addition, it is likely that mono-allelic inactivation of these and other genes may be insufficient to impair  
321 HR function<sup>51</sup>. Tumors with homozygous deletions in *TP53* were significantly similar to the BRCAness  
322 groups; somatic mutations in this gene showed considerable overlap with the BRCAness tumors, but this  
323 similarity did not reach statistical significance. *TP53* has long been recognized as an important gene in breast  
324 cancer, and mutations in this gene have been shown to associate with germline mutations in *BRCA1* and  
325 *BRCA2*<sup>93,94</sup>. However, because *TP53* mutations occur frequently in breast cancer overall, they may be  
326 sensitive but non-specific biomarkers of BRCAness. Perhaps *TP53* aberrations act as secondary events that  
327 compromise genomic integrity in combination with initiating events in the HR pathway.

328 Although the mutational-signature patterns we observed were highly consistent in many cases, it remains to  
329 be determined whether these observations are clinically relevant. Clinical trials are currently underway to  
330 identify biomarkers for carboplatin, a platinum-salt agent. Tutt, et al. concluded that *BRCA1/BRCA2*  
331 mutations and triple-negative hormone status were reliable biomarkers of objective treatment responses but  
332 that *BRCA1* hypermethylation was not<sup>89</sup>. It may be that other BRCAness genes or different types of  
333 aberration will become useful markers of treatment response.

334 Our statistical-resampling approach uses Euclidean distances to evaluate similarity (see Methods). For  
335 visualization, we used a two-dimensional representation of the same data. In most cases, these two methods

336 led to similar conclusions. However, we placed most confidence in the empirical p-values calculated using  
337 our resampling approach, even if those conclusions differed from what we observed visually.

## 338 **Conclusions**

339 Altogether our findings shed new light on factors that may be useful to classify patients into the BRCAness  
340 category and demonstrate an objective methodology for categorizing tumor subtypes, in general.

341 **Figures**

**A Germline mutations**

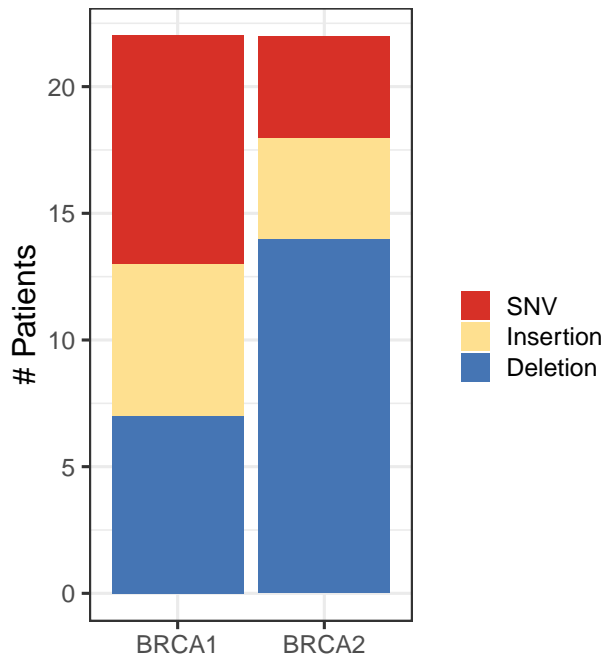

**B Somatic mutations**

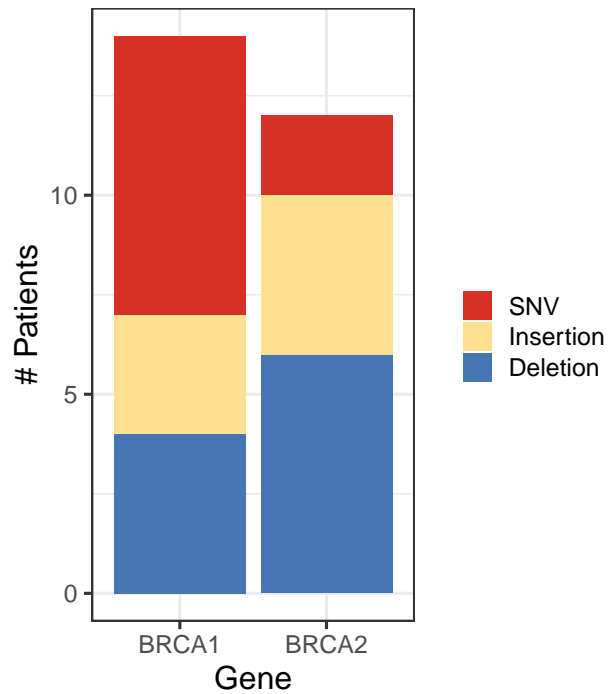

342

**C Copy number**

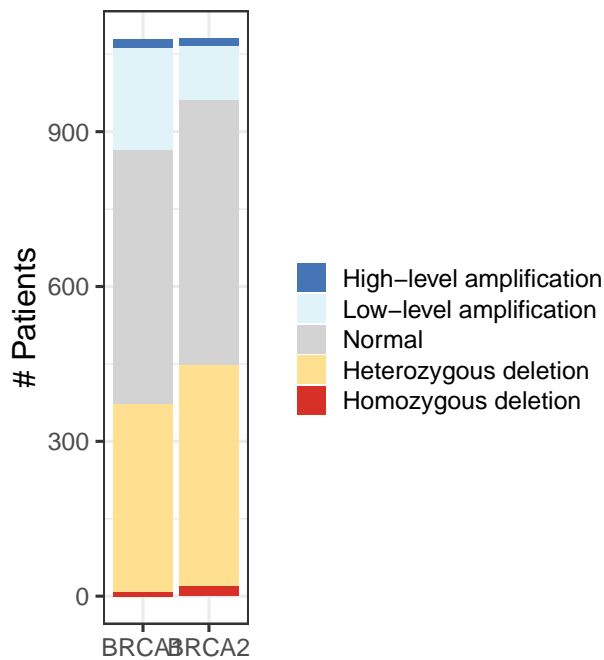

**D DNA methylation**

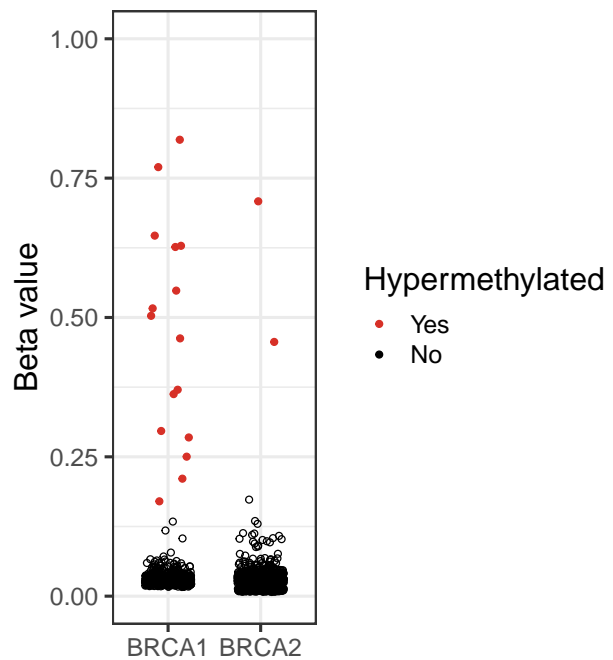

343 **Figure 1: Molecular aberrations in *BRCA1* and *BRCA2* across all breast-cancer patients.** A) Germline  
344 mutations, B) Somatic mutations, C) copy-number variations, D) DNA methylation levels. SNV = single nucleotide  
345 variation.

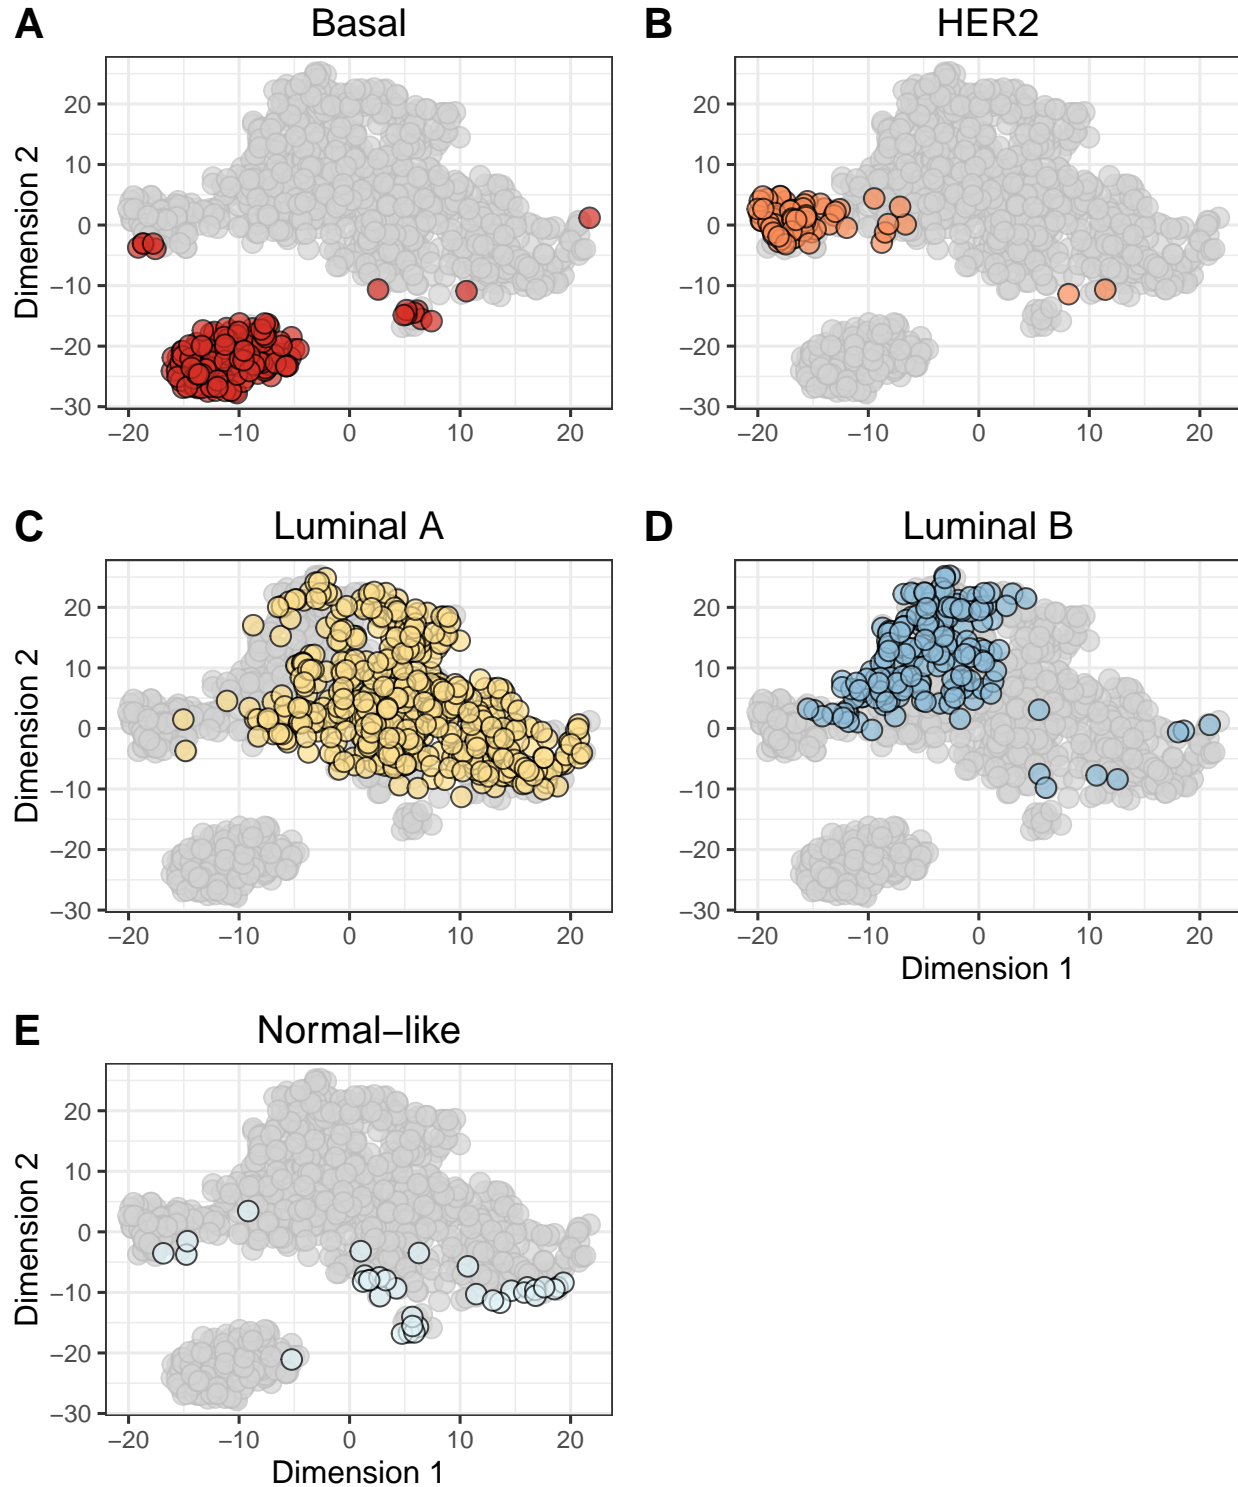

347 **Figure 2: Two-dimensional representation of PAM50 gene-expression levels.** We obtained expression levels for  
348 the PAM50 genes and used the t-distributed Stochastic Neighbor Embedding (t-SNE) method to reduce the data to two  
349 dimensions. Each point on the plot represents a single tumor, overlaid with colors that represent the tumor's primary  
350 PAM50 subtype. Generally, the PAM50 subtypes clustered cohesively, but there were exceptions. For example, some



351 Basal tumors (A) exhibited expression patterns that differed considerably from the remaining Basal tumors. The  
352 normal-like tumors (E) showed the most variability in expression.

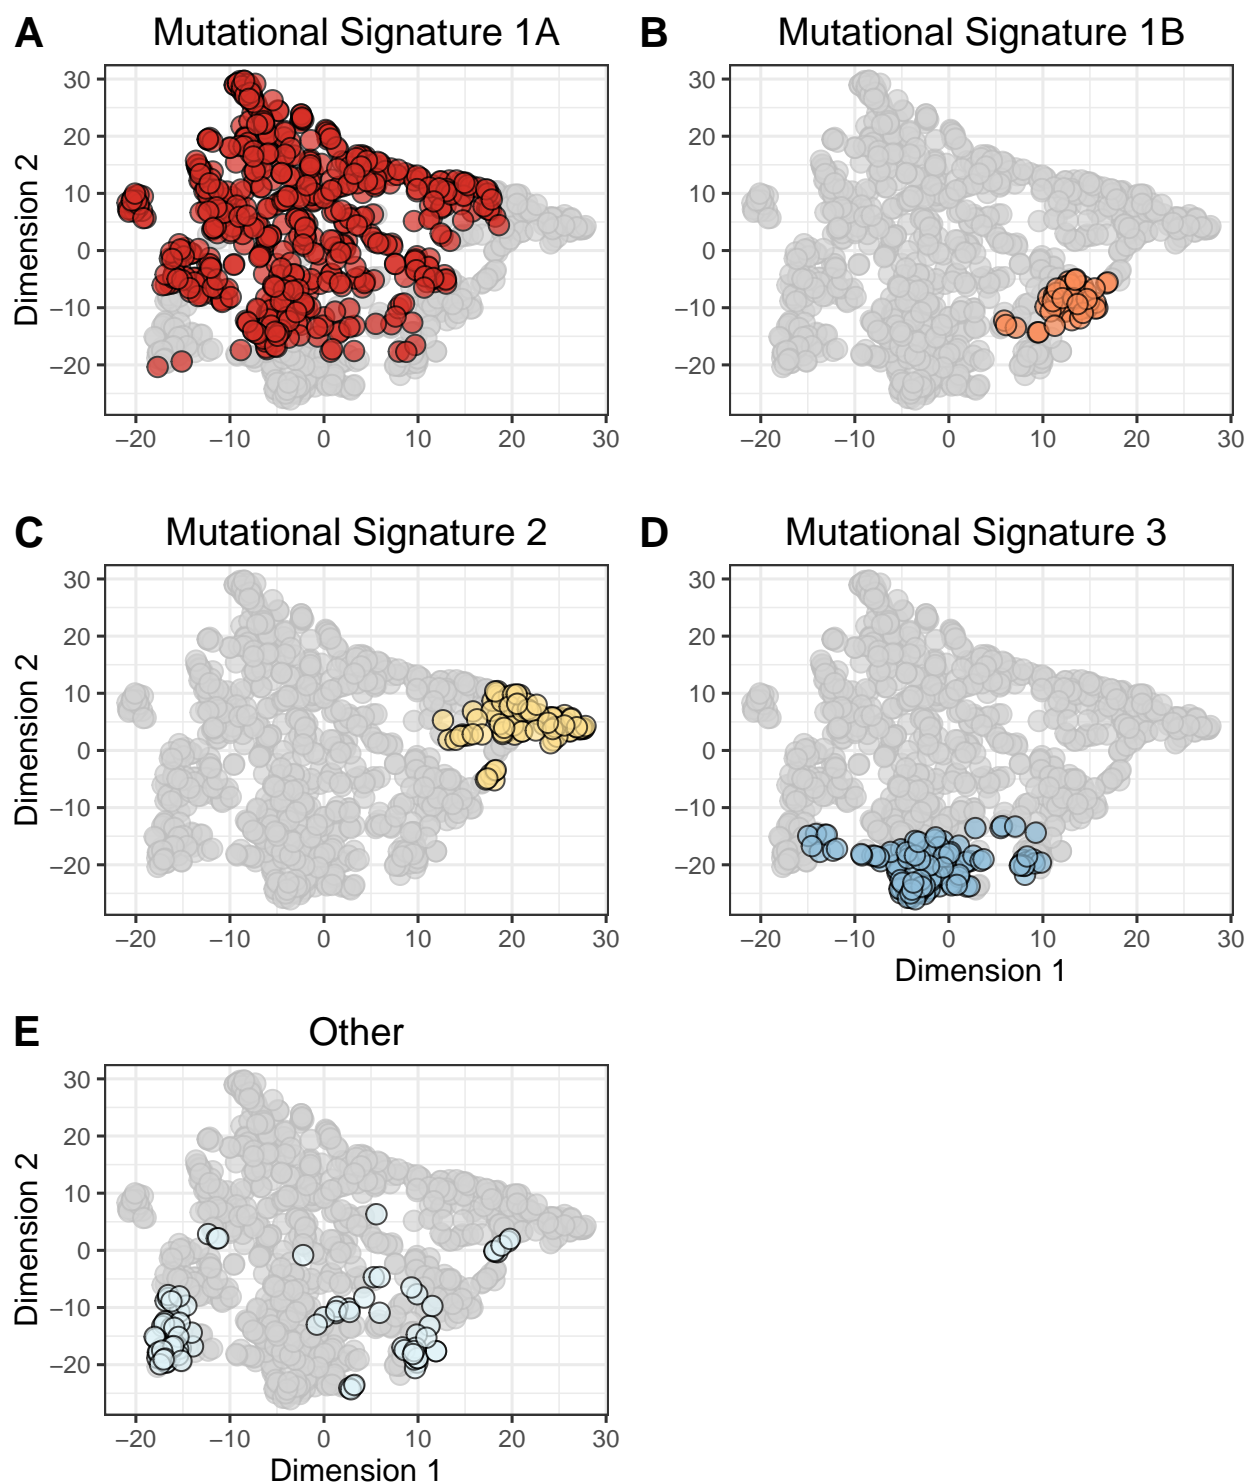

354 **Figure 3: Two-dimensional representation of somatic-mutation signatures.** We summarized each tumor based on  
355 their somatic-mutation signatures, which represent overall mutational patterns in a trinucleotide context. We used the  
356 t-distributed Stochastic Neighbor Embedding (t-SNE) method to reduce the data to two dimensions. Each point on the  
357 plot represents a single tumor, overlaid with colors that represent the tumor's primary somatic-mutation signature.  
358 Mutational Signature 1A (A) was the most prevalent; these tumors were widely dispersed across the signature

359 landscape. Signatures 1B (B), 2 (C), and 3 (D) were relatively small and formed cohesive clusters. The remaining 23  
360 clusters were rare individually and were dispersed broadly.

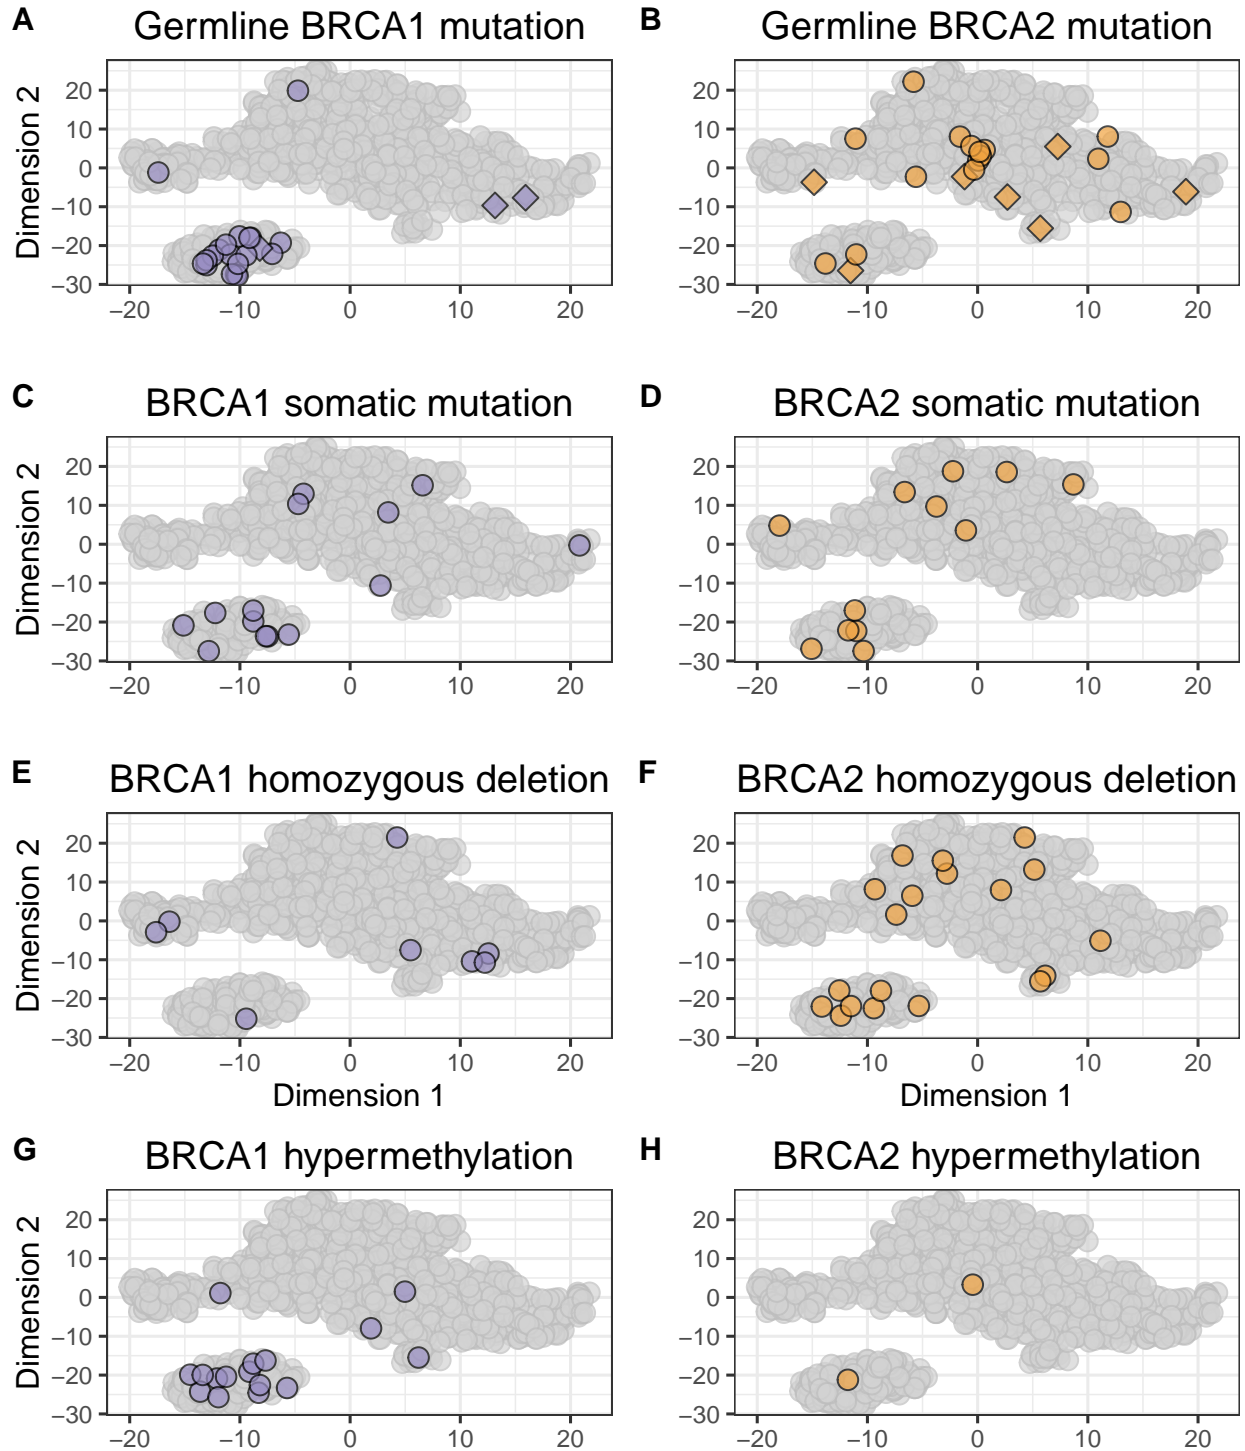

361

362 **Figure 4: BRCA1 and BRCA2 aberrations on the PAM50 gene-expression landscape.** Using the same  
363 two-dimensional representation of PAM50 gene-expression levels shown in Figure 2, this plot indicates which patients  
364 had germline mutations (A, B), somatic mutations (C, D), homozygous deletions (E, F), or hypermethylation events (G,  
365 H) in *BRCA1* and *BRCA2*, respectively. Many of these tumors overlapped with the Basal subtype, but other tumors

366 were dispersed broadly across the gene-expression landscape. Diamonds represent tumors with multiple aberrations of  
367 a given type.

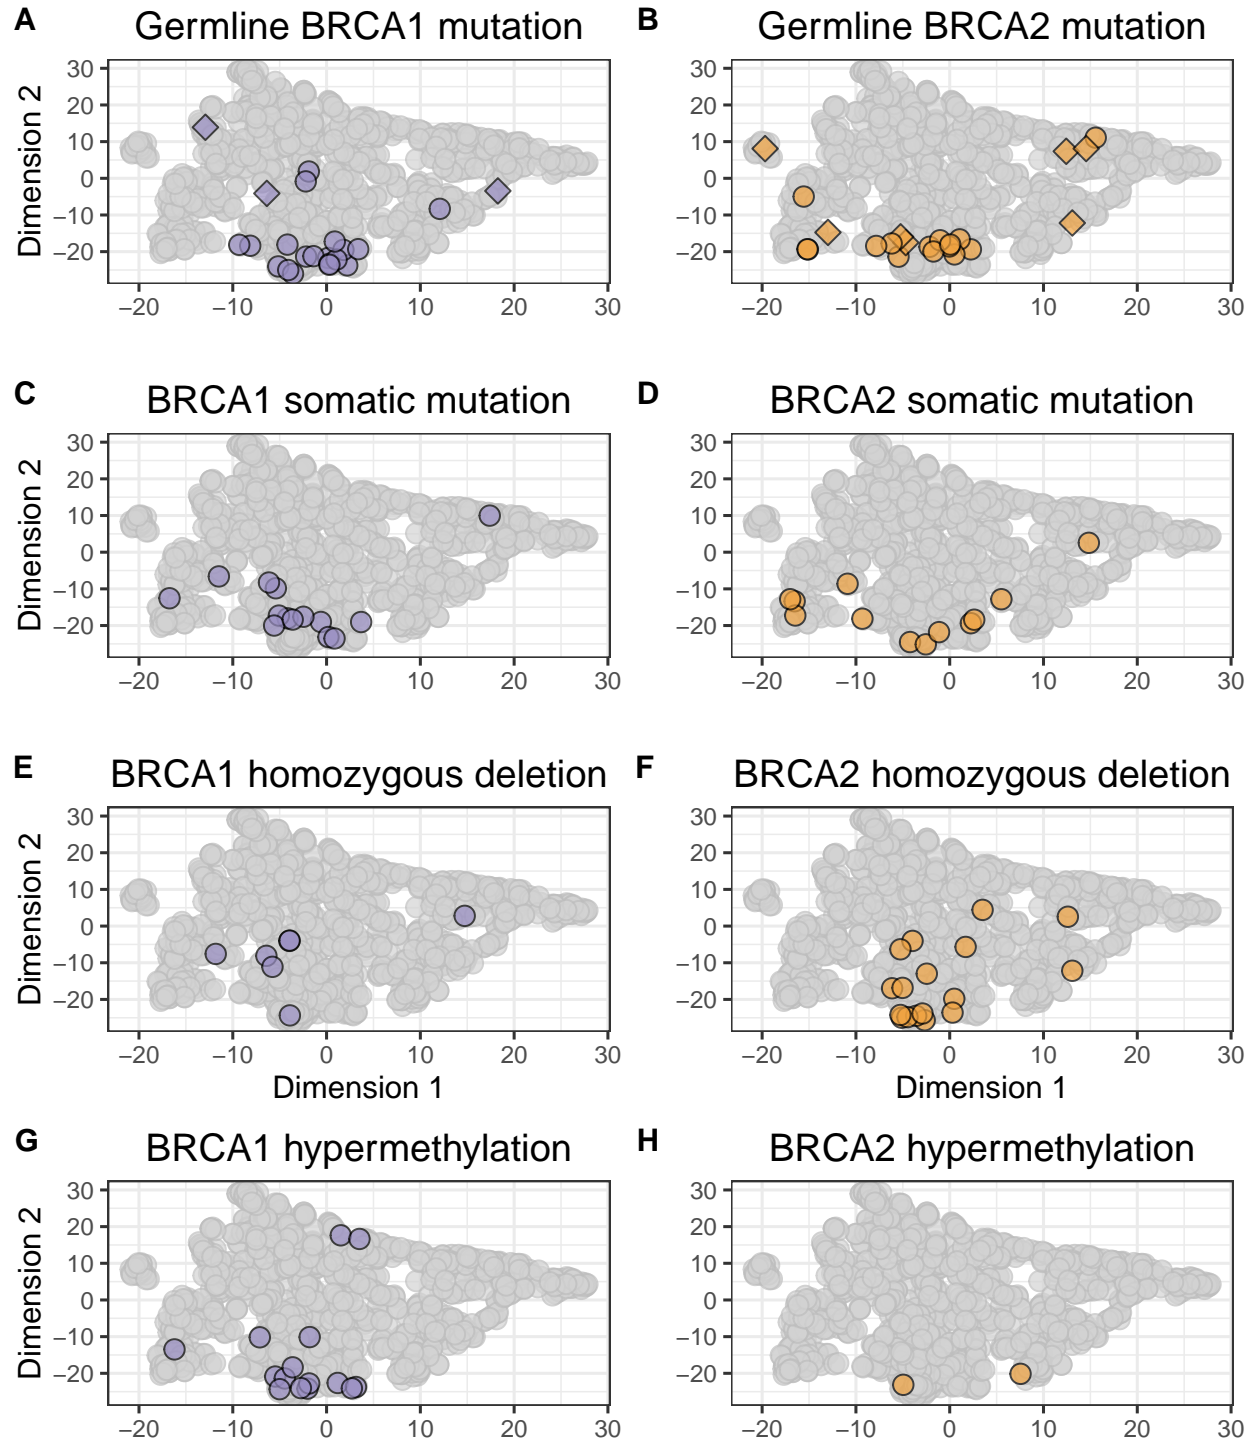

368

369 **Figure 5: *BRCA1* and *BRCA2* aberrations on the somatic-mutation signature landscape.** Using the same  
370 two-dimensional representation of mutational signatures shown in Figure 3, this plot indicates which patients had  
371 germline mutations (A, B), somatic mutations (C, D), homozygous deletions (E, F), or hypermethylation events (G, H)  
372 in *BRCA1* and *BRCA2*, respectively. Largely, these tumors had similar somatic-mutation signatures. Diamonds  
373 represent tumors with multiple aberrations of a given type.

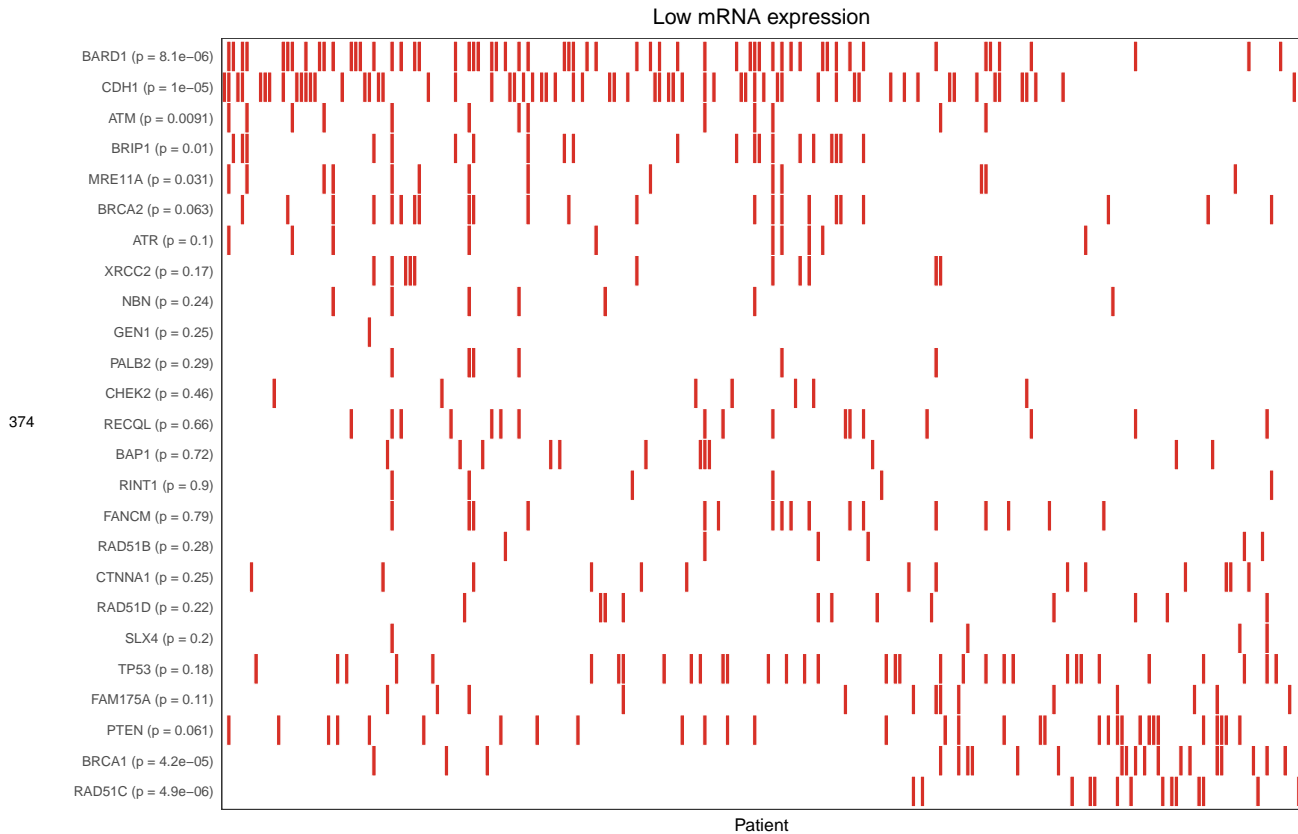

375 **Figure 6: Relationship between BRCA aberration status and relatively low gene expression.** We identified  
376 tumors with relatively low expression for cancer-predisposition genes (see Figure S23) and evaluated whether the  
377 somatic-mutation signatures of these tumors were relatively similar or dissimilar to tumors with a BRCA aberration.  
378 Low expression of RAD51C and BRCA1 showed the strongest *positive* correlation between gene-expression status and  
379 the BRCAness reference group. Low expression of BARD1 and CDH1 showed the strongest *negative* correlation  
380 between gene-expression status and the BRCAness reference group.



## 381 Tables

382 **Table 1: Results of similarity comparisons among BRCA aberration groups.** We compared PAM50  
383 gene-expression levels or somatic-mutation signatures between groups of patients who harbored aberrations  
384 in *BRCA1* or *BRCA2*. We evaluated whether patients in one group (e.g., those who harbored a *BRCA1*  
385 germline mutation) were more similar to patients in a second group (e.g., those with *BRCA2* germline  
386 mutation) than random patient subsets of the same sizes. The numbers in this table represent empirical  
387 p-values. In cases where an individual harbored an aberration in both comparison groups, we excluded that  
388 patient from the comparison.

| Aberration Type 1                | Aberration Type 2                  | PAM50 Subtypes | Mutational Signatures |
|----------------------------------|------------------------------------|----------------|-----------------------|
| BRCA1 germline mutation (n = 22) | BRCA2 germline mutation (n = 22)   | 0.997          | 1e-04                 |
| BRCA1 germline mutation (n = 22) | BRCA1 somatic mutation (n = 14)    | 0.1203         | 1e-04                 |
| BRCA1 germline mutation (n = 22) | BRCA1 homozygous deletion (n = 8)  | 0.924          | 0.0246                |
| BRCA1 germline mutation (n = 22) | BRCA1 hypermethylation (n = 16)    | 0.0182         | 1e-04                 |
| BRCA2 germline mutation (n = 22) | BRCA2 somatic mutation (n = 12)    | 0.8818         | 0.0013                |
| BRCA2 germline mutation (n = 22) | BRCA2 homozygous deletion (n = 19) | 0.6394         | 1e-04                 |
| BRCA2 germline mutation (n = 22) | BRCA2 hypermethylation (n = 2)     | 0.6855         | 0.0014                |

389 **Table 2: Summary of comparisons between the BRCAness reference group and groups of patients**  
390 **who harbored a specific type of aberration in a candidate BRCAness gene.** We evaluated whether  
391 somatic-mutation signatures from patients who harbored a given type of aberration (e.g., BARD1 germline  
392 mutation) were more similar to the BRCAness reference group than expected by random chance. The  
393 numbers in this table represent empirical p-values. In cases where no patient had a given type of aberration in  
394 a given gene, we list “N/A”. The “Any” group represents individuals who harbored any type of aberration in  
395 a given gene.

| Gene    | Germline mutation | Somatic mutation | Homozygous deletion | Hypermethylation | Any              |
|---------|-------------------|------------------|---------------------|------------------|------------------|
| BARD1   | 1e-04 (n = 1)     | 1e-04 (n = 2)    | 4e-04 (n = 5)       | N/A              | 1e-04 (n = 8)    |
| CTNNA1  | N/A               | 0.991 (n = 8)    | 2e-04 (n = 6)       | N/A              | 0.6149 (n = 14)  |
| FAM175A | N/A               | 0.993 (n = 2)    | 2e-04 (n = 3)       | N/A              | 0.2417 (n = 5)   |
| PALB2   | 0.0098 (n = 3)    | 0.8695 (n = 5)   | N/A                 | N/A              | 0.3641 (n = 8)   |
| PTEN    | 0.9594 (n = 1)    | 0.9986 (n = 51)  | 0.0203 (n = 56)     | 0.7675 (n = 2)   | 0.797 (n = 110)  |
| RAD51B  | 0.0013 (n = 3)    | 0.5743 (n = 3)   | 0.3831 (n = 9)      | N/A              | 0.2595 (n = 15)  |
| RAD51C  | 0.0469 (n = 1)    | 0.9848 (n = 3)   | 0.0151 (n = 2)      | 0.0012 (n = 32)  | 0.0027 (n = 38)  |
| TP53    | 0.9246 (n = 2)    | 0.0747 (n = 302) | 0.0015 (n = 15)     | N/A              | 0.0751 (n = 319) |

## 396 **Declarations**

### 397 **Ethics approval and consent to participate**

398 Brigham Young University's Institutional Review Board approved this study under exemption status. This  
399 study uses data collected from public repositories only. We played no part in patient recruiting or in obtaining  
400 consent. We have adhered to guidelines from TCGA on handling data.

### 401 **Consent for publication**

402 Not applicable.

### 403 **Availability of data and material**

404 The datasets generated and analyzed during the current study are available in the Open Science Framework  
405 repository (<https://osf.io/9jhr2>). (We are not permitted to share the germline-mutation data.)

### 406 **Competing interests**

407 TW consults for Color Genomics. Otherwise, the authors declare that they have no competing interests.

### 408 **Funding**

409 Funding for this study was provided through Brigham Young University Graduate Studies and the Simmons  
410 Center for Cancer Research. In addition, we acknowledge grant support from NIH 1R35CA197458, Komen  
411 Foundation SAC110020, and Breast Cancer Research Foundation BCRF18-088.

### 412 **Author's contributions**

413 WRB and SRP conceived the study design, prepared and analyzed data, and interpreted results. BHS, TW,  
414 SG, and MCK evaluated variant pathogenicity and contributed intellectual insights regarding study design  
415 and data interpretation. AP and MR parsed and evaluated the pharmacological data. WRB and SRP wrote the  
416 manuscript. BHS, TW, MCK, AP and MR edited the manuscript.

417 **Acknowledgements**

418 Results from this study are in part based upon data generated by TCGA and managed by the United States  
419 National Cancer Institute and National Human Genome Research Institute (see <http://cancergenome.nih.gov>).  
420 We thank the patients who participated in this study and shared their data publicly. We thank the Fulton  
421 Supercomputing Laboratory at Brigham Young University for providing computational facilities.

## 422 **References**

- 423 1. Hall, J. M. *et al.* Linkage of early-onset familial breast cancer to chromosome 17q21. *Science (New York,*  
424 *N.Y.)* **250**, 1684–9 (1990).
- 425 2. Moynahan, M. E., Chiu, J. W., Koller, B. H. & Jasin, M. Brca1 Controls Homology-Directed DNA Repair.  
426 *Molecular Cell* **4**, 511–518 (1999).
- 427 3. Stratton, M. R. & Rahman, N. The emerging landscape of breast cancer susceptibility. *Nature genetics* **40**,  
428 17–22 (2008).
- 429 4. John, E. M. *et al.* Prevalence of pathogenic BRCA1 mutation carriers in 5 US racial/ethnic groups. *JAMA*  
430 **298**, 2869–2876 (2007).
- 431 5. Malone, K. E. *et al.* Prevalence and predictors of BRCA1 and BRCA2 mutations in a population-based  
432 study of breast cancer in white and black American women ages 35 to 64 years. *Cancer Research* **66**,  
433 8297–8308 (2006).
- 434 6. Li, X. & Heyer, W.-D. Homologous recombination in DNA repair and DNA damage tolerance. *Cell*  
435 *Research* **18**, 99–113 (2008).
- 436 7. O’Donovan, P. J. & Livingston, D. M. BRCA1 and BRCA2: Breast/ovarian cancer susceptibility gene  
437 products and participants in DNA double-strand break repair. *Carcinogenesis* **31**, 961–7 (2010).
- 438 8. Lord, C. J. & Ashworth, A. The DNA damage response and cancer therapy. *Nature* **481**, 287–294 (2012).
- 439 9. Tutt, A. *et al.* Mutation in Brca2 stimulates error-prone homology-directed repair of DNA double-strand  
440 breaks occurring between repeated sequences. *The EMBO Journal* **20**, 4704–4716 (2001).
- 441 10. Xia, F. *et al.* Deficiency of human BRCA2 leads to impaired homologous recombination but maintains  
442 normal nonhomologous end joining. *Proceedings of the National Academy of Sciences of the United States of*  
443 *America* **98**, 8644–8649 (2001).
- 444 11. Moynahan, M. E., Pierce, A. J. & Jasin, M. BRCA2 is required for homology-directed repair of  
445 chromosomal breaks. *Molecular Cell* **7**, 263–272 (2001).
- 446 12. Moore, K. *et al.* Maintenance Olaparib in Patients with Newly Diagnosed Advanced Ovarian Cancer. *The*  
447 *New England Journal of Medicine* **379**, 2495–2505 (2018).

- 448 13. Robson, M. *et al.* Olaparib for Metastatic Breast Cancer in Patients with a Germline BRCA Mutation.  
449 *The New England Journal of Medicine* **377**, 523–533 (2017).
- 450 14. Litton, J. K. *et al.* Talazoparib in Patients with Advanced Breast Cancer and a Germline BRCA Mutation.  
451 *The New England Journal of Medicine* **379**, 753–763 (2018).
- 452 15. Commissioner, O. of the. Press Announcements - FDA approves first treatment for breast cancer with a  
453 certain inherited genetic mutation.
- 454 16. Tutt, A. *et al.* Oral poly(ADP-ribose) polymerase inhibitor olaparib in patients with BRCA1 or BRCA2  
455 mutations and advanced breast cancer: A proof-of-concept trial. *Lancet (London, England)* **376**, 235–244  
456 (2010).
- 457 17. Fong, P. C. *et al.* Inhibition of poly(ADP-ribose) polymerase in tumors from BRCA mutation carriers.  
458 *The New England Journal of Medicine* **361**, 123–134 (2009).
- 459 18. Nik-Zainal, S. *et al.* Mutational Processes Molding the Genomes of 21 Breast Cancers. *Cell* 979–993  
460 (2012). doi:[10.1016/j.cell.2012.04.024](https://doi.org/10.1016/j.cell.2012.04.024)
- 461 19. Alexandrov, L. B. *et al.* Signatures of mutational processes in human cancer. *Nature* **500**, 415–21 (2013).
- 462 20. Zou, X. *et al.* Validating the concept of mutational signatures with isogenic cell models. *Nature*  
463 *Communications* **9**, 1744 (2018).
- 464 21. Sorlie, T. *et al.* Gene expression patterns of breast carcinomas distinguish tumor subclasses with clinical  
465 implications. *Proc Natl Acad Sci U S A* **98**, 10869–10874 (2001).
- 466 22. Foulkes, W. D. *et al.* Germline BRCA1 mutations and a basal epithelial phenotype in breast cancer.  
467 *Journal of the National Cancer Institute* **95**, 1482–1485 (2003).
- 468 23. Lee, E. *et al.* Characteristics of triple-negative breast cancer in patients with a BRCA1 mutation: Results  
469 from a population-based study of young women. *Journal of Clinical Oncology: Official Journal of the*  
470 *American Society of Clinical Oncology* **29**, 4373–4380 (2011).
- 471 24. Koboldt, D. C. *et al.* Comprehensive molecular portraits of human breast tumours. *Nature* **490**, 61–70  
472 (2012).
- 473 25. Sørli, T. *et al.* Repeated observation of breast tumor subtypes in independent gene expression data sets.  
474 *Proc Natl Acad Sci U S A* **100**, 8418–8423 (2003).

- 475 26. Foulkes, W. D. *et al.* The prognostic implication of the basal-like (cyclin E high/p27  
476 low/p53+/glomeruloid-microvascular-proliferation+) phenotype of BRCA1-related breast cancer. *Cancer*  
477 *Research* **64**, 830–835 (2004).
- 478 27. Severson, T. M. *et al.* The BRCA1ness signature is associated significantly with response to PARP  
479 inhibitor treatment versus control in the I-SPY 2 randomized neoadjuvant setting. *Breast Cancer Research*  
480 **19**, 99 (2017).
- 481 28. Wood, L. D. *et al.* The genomic landscapes of human breast and colorectal cancers. *Science (New York,*  
482 *N.Y.)* **318**, 1108–13 (2007).
- 483 29. Turner, N., Tutt, A. & Ashworth, A. Hallmarks of 'BRCAness' in sporadic cancers. *Nature reviews.*  
484 *Cancer* **4**, 814–9 (2004).
- 485 30. Lord, C. J. & Ashworth, A. BRCAness revisited. *Nature Reviews Cancer* **16**, 110–120 (2016).
- 486 31. Davies, H. *et al.* HRDetect is a predictor of BRCA1 and BRCA2 deficiency based on mutational  
487 signatures. *Nature Medicine* **23**, 517–525 (2017).
- 488 32. Polak, P. *et al.* A mutational signature reveals alterations underlying deficient homologous recombination  
489 repair in breast cancer. *Nature Genetics* **49**, 1476–1486 (2017).
- 490 33. Woodward, A. M., Davis, T. A., Silva, A. G. S., Kirk, J. A. & Leary, J. A. Large genomic rearrangements  
491 of both BRCA2 and BRCA1 are a feature of the inherited breast/ovarian cancer phenotype in selected  
492 families. *Journal of Medical Genetics* **42**, e31–e31 (2005).
- 493 34. Hogervorst, F. B. L. *et al.* Large Genomic Deletions and Duplications in the BRCA1 Gene Identified by a  
494 Novel Quantitative Method. *Cancer Research* **63**, 1449–1453 (2003).
- 495 35. Esteller, M. *et al.* Promoter hypermethylation and BRCA1 inactivation in sporadic breast and ovarian  
496 tumors. *Journal of the National Cancer Institute* **92**, 564–9 (2000).
- 497 36. Perou, C. M. *et al.* Molecular portraits of human breast tumours. *Nature* **406**, 747–52 (2000).
- 498 37. Parker, J. S. *et al.* Supervised risk predictor of breast cancer based on intrinsic subtypes. *Journal of*  
499 *clinical oncology : official journal of the American Society of Clinical Oncology* **27**, 1160–7 (2009).
- 500 38. Wilks, C. *et al.* The Cancer Genomics Hub (CGHub): Overcoming cancer through the power of torrential  
501 data. *Database: The Journal of Biological Databases and Curation* **2014**, (2014).



- 502 39. Li, H. & Durbin, R. Fast and accurate short read alignment with Burrows-Wheeler transform.  
503 *Bioinformatics (Oxford, England)* **25**, 1754–60 (2009).
- 504 40. Harrow, J. *et al.* GENCODE: The reference human genome annotation for The ENCODE Project.  
505 *Genome Research* **22**, 1760–1774 (2012).
- 506 41. Tarasov, A., Vilella, A. J., Cuppen, E., Nijman, I. J. & Prins, P. Sambamba: Fast processing of NGS  
507 alignment formats. *Bioinformatics (Oxford, England)* **31**, 2032–2034 (2015).
- 508 42. Walsh, T. *et al.* Detection of inherited mutations for breast and ovarian cancer using genomic capture and  
509 massively parallel sequencing. *Proceedings of the National Academy of Sciences of the United States of*  
510 *America* **107**, 12629–12633 (2010).
- 511 43. Shirts, B. H. *et al.* Improving performance of multigene panels for genomic analysis of cancer  
512 predisposition. *Genetics in Medicine: Official Journal of the American College of Medical Genetics* **18**,  
513 974–981 (2016).
- 514 44. Quinlan, A. R. & Hall, I. M. BEDTools: A flexible suite of utilities for comparing genomic features.  
515 *Bioinformatics (Oxford, England)* **26**, 841–842 (2010).
- 516 45. Garrison, E. & Marth, G. Haplotype-based variant detection from short-read sequencing.  
517 *arXiv:1207.3907 [q-bio]* (2012).
- 518 46. Cingolani, P. *et al.* A program for annotating and predicting the effects of single nucleotide  
519 polymorphisms, SnpEff: SNPs in the genome of *Drosophila melanogaster* strain w1118; iso-2; iso-3. *Fly* **6**,  
520 80–92 (2012).
- 521 47. Paila, U., Chapman, B. A., Kirchner, R. & Quinlan, A. R. GEMINI: Integrative exploration of genetic  
522 variation and genome annotations. *PLoS computational biology* **9**, e1003153 (2013).
- 523 48. Tange, O. GNU Parallel - The Command-Line Power Tool.;*login: The USENIX Magazine* **36**, 42–47  
524 (2011).
- 525 49. Shirts, B. H. *et al.* Improving performance of multigene panels for genomic analysis of cancer  
526 predisposition. *Genetics in Medicine: Official Journal of the American College of Medical Genetics* **18**,  
527 974–981 (2016).
- 528 50. Lu, C. *et al.* Patterns and functional implications of rare germline variants across 12 cancer types. *Nature*  
529 *Communications* **6**, 10086 (2015).

- 530 51. Riaz, N. *et al.* Pan-cancer analysis of bi-allelic alterations in homologous recombination DNA repair  
531 genes. *Nature Communications* **8**, 857 (2017).
- 532 52. Cibulskis, K. *et al.* Sensitive detection of somatic point mutations in impure and heterogeneous cancer  
533 samples. *Nature Biotechnology* **31**, 213–219 (2013).
- 534 53. Jensen, M. A., Ferretti, V., Grossman, R. L. & Staudt, L. M. The NCI Genomic Data Commons as an  
535 engine for precision medicine. *Blood* blood–2017–03–735654 (2017). doi:[10.1182/blood-2017-03-735654](https://doi.org/10.1182/blood-2017-03-735654)
- 536 54. Kumar, P., Henikoff, S. & Ng, P. C. Predicting the effects of coding non-synonymous variants on protein  
537 function using the SIFT algorithm. *Nature protocols* **4**, 1073–81 (2009).
- 538 55. Adzhubei, I., Jordan, D. M. & Sunyaev, S. R. Predicting functional effect of human missense mutations  
539 using PolyPhen-2. *Current protocols in human genetics / editorial board, Jonathan L. Haines ... [et al.]*  
540 **Chapter 7**, Unit7.20 (2013).
- 541 56. Dayton, J. B. & Piccolo, S. R. Classifying cancer genome aberrations by their mutually exclusive effects  
542 on transcription. *BMC Medical Genomics* **10**, 66 (2017).
- 543 57. Lek, M. *et al.* Analysis of protein-coding genetic variation in 60,706 humans. *Nature* **536**, 285–291  
544 (2016).
- 545 58. Pritchard, C. C. *et al.* Validation and implementation of targeted capture and sequencing for the detection  
546 of actionable mutation, copy number variation, and gene rearrangement in clinical cancer specimens. *The*  
547 *Journal of molecular diagnostics: JMD* **16**, 56–67 (2014).
- 548 59. Landrum, M. J. *et al.* ClinVar: Public archive of interpretations of clinically relevant variants. *Nucleic*  
549 *Acids Research* **44**, D862–D868 (2016).
- 550 60. Landrum, M. J. *et al.* ClinVar: Public archive of interpretations of clinically relevant variants. *Nucleic*  
551 *Acids Research* **44**, D862–D868 (2016).
- 552 61. Rosenthal, R., McGranahan, N., Herrero, J., Taylor, B. S. & Swanton, C. deconstructSigs: Delineating  
553 mutational processes in single tumors distinguishes DNA repair deficiencies and patterns of carcinoma  
554 evolution. *Genome Biology* **17**, (2016).
- 555 62. Goldman, M. *et al.* The UCSC Cancer Genomics Browser: Update 2015. *Nucleic Acids Research* **43**,  
556 D812–D817 (2015).

- 557 63. Price, M. E. *et al.* Additional annotation enhances potential for biologically-relevant analysis of the  
558 Illumina Infinium HumanMethylation450 BeadChip array. *Epigenetics & Chromatin* **6**, 4 (2013).
- 559 64. Loo, M. van der. Extremevalues: An R-package for distribution-based outlier detection. (2017).
- 560 65. Mermel, C. H. *et al.* GISTIC2.0 facilitates sensitive and confident localization of the targets of focal  
561 somatic copy-number alteration in human cancers. *Genome Biology* **12**, R41 (2011).
- 562 66. Nielsen, T. O. *et al.* A comparison of PAM50 intrinsic subtyping with immunohistochemistry and  
563 clinical prognostic factors in tamoxifen-treated estrogen receptor-positive breast cancer. *Clinical Cancer*  
564 *Research: An Official Journal of the American Association for Cancer Research* **16**, 5222–5232 (2010).
- 565 67. Netanel, D., Avraham, A., Ben-Baruch, A., Evron, E. & Shamir, R. Expression and methylation patterns  
566 partition luminal-A breast tumors into distinct prognostic subgroups. *Breast Cancer Research* **18**, 74 (2016).
- 567 68. Rahman, M. *et al.* Alternative preprocessing of RNA-Sequencing data in The Cancer Genome Atlas  
568 leads to improved analysis results. *Bioinformatics (Oxford, England)* **31**, 3666–3672 (2015).
- 569 69. Sioutos, N. *et al.* NCI Thesaurus: A semantic model integrating cancer-related clinical and molecular  
570 information. *Journal of Biomedical Informatics* **40**, 30–43 (2007).
- 571 70. R Core Team. *R: A Language and Environment for Statistical Computing*. (R Foundation for Statistical  
572 Computing, 2016).
- 573 71. Wickham, H., Hester, J. & Francois, R. Readr: Read Tabular Data. (2016).
- 574 72. Wickham, H. & Francois, R. Dplyr: A Grammar of Data Manipulation. (2016).
- 575 73. Wickham, H. *Ggplot2: Elegant Graphics for Data Analysis*. (Springer-Verlag New York, 2009).
- 576 74. Wickham, H. & Henry, L. Tidy: Easily Tidy Data with 'spread()' and 'gather()' Functions. (2018).
- 577 75. Wickham, H. Reshaping Data with the reshape Package. *Journal of Statistical Software* **21**, 1–20 (2007).
- 578 76. Slowikowski, K. Ggrepel: Automatically Position Non-Overlapping Text Labels with 'ggplot2'. (2018).
- 579 77. Wilke, C. O. Cowplot: Streamlined Plot Theme and Plot Annotations for 'ggplot2'. (2017).
- 580 78. Dowle, M. & Srinivasan, A. Data.Table: Extension of 'data.Frame'. (2018).
- 581 79. Gehlenborg, N. *UpSetR: A More Scalable Alternative to Venn and Euler Diagrams for Visualizing*  
582 *Intersecting Sets*. (2017).

- 583 80. Team, T. B. D. BSgenome.Hsapiens.UCSC.Hg38: Full genome sequences for Homo sapiens (UCSC  
584 version hg38). (2015).
- 585 81. Huber, W. *et al.* Orchestrating high-throughput genomic analysis with Bioconductor. *Nature Methods* **12**,  
586 115–121 (2015).
- 587 82. Krijthe, J. H. *Rtsne: T-Distributed Stochastic Neighbor Embedding using Barnes-Hut Implementation*.  
588 (2015).
- 589 83. van der Maaten, L. & Hinton, G. Visualizing High-Dimensional Data Using t-SNE. *Journal of Machine*  
590 *Learning Research* **9**, 2579–2605 (2008).
- 591 84. van der Maaten, L. Accelerating t-SNE using Tree-Based Algorithms. *Journal of Machine Learning*  
592 *Research* **15**, 3221–3245 (2014).
- 593 85. Hayden, D., Lazar, P., Schoenfeld, D. & Inflammation and the Host Response to Injury Investigators.  
594 Assessing statistical significance in microarray experiments using the distance between microarrays. *PLoS*  
595 *One* **4**, e5838 (2009).
- 596 86. Knudson, A. G. Mutation and Cancer: Statistical Study of Retinoblastoma. *Proceedings of the National*  
597 *Academy of Sciences of the United States of America* **68**, 820–823 (1971).
- 598 87. Farmer, H. *et al.* Targeting the DNA repair defect in BRCA mutant cells as a therapeutic strategy. *Nature*  
599 **434**, 917–921 (2005).
- 600 88. Bryant, H. E. *et al.* Specific killing of BRCA2-deficient tumours with inhibitors of poly(ADP-ribose)  
601 polymerase. *Nature* **434**, 913–917 (2005).
- 602 89. Tutt, A. *et al.* Carboplatin in BRCA1/2 -mutated and triple-negative breast cancer BRCAness subgroups:  
603 The TNT Trial. *Nature Medicine* **24**, 628–637 (2018).
- 604 90. Zhao, W. *et al.* Promotion of RAD51-mediated homologous DNA pairing by BRCA1-BARD1. *Nature*  
605 **550**, 360–365 (2017).
- 606 91. Couch, F. J. *et al.* Inherited mutations in 17 breast cancer susceptibility genes among a large  
607 triple-negative breast cancer cohort unselected for family history of breast cancer. *Journal of Clinical*  
608 *Oncology: Official Journal of the American Society of Clinical Oncology* **33**, 304–311 (2015).
- 609 92. Shimelis, H. *et al.* Triple-Negative Breast Cancer Risk Genes Identified by Multigene Hereditary Cancer  
610 Panel Testing. *Journal of the National Cancer Institute* (2018). doi:[10.1093/jnci/djy106](https://doi.org/10.1093/jnci/djy106)

- 611 93. Crook, T. *et al.* P53 mutation with frequent novel codons but not a mutator phenotype in BRCA1- and  
612 BRCA2-associated breast tumours. *Oncogene* **17**, 1681–1689 (1998).
- 613 94. Greenblatt, M. S., Chappuis, P. O., Bond, J. P., Hamel, N. & Foulkes, W. D. TP53 mutations in breast  
614 cancer associated with BRCA1 or BRCA2 germ-line mutations: Distinctive spectrum and structural  
615 distribution. *Cancer Research* **61**, 4092–4097 (2001).
