# Supplementary material for: Effects of germline and somatic events in candidate BRCAness genes on breast-tumor signatures
Source: bioRxiv or medRxiv preprint supplement (doi:10.1101/662874), 2020-05-30
Supplement: Supplementary file [file media-1.pdf]

# 1 **Markers of BRCAness in breast cancer**

## 2 *Supplementary Material*

3 Weston R. Bodily<sup>1</sup>, Brian H. Shirts<sup>2</sup>, Tom Walsh<sup>3,4</sup>, Suleyman Gulsuner<sup>3,4</sup>, Mary-Claire King<sup>3,4</sup>,  
4 Alyssa Parker<sup>1</sup>, Moom Roosan<sup>5</sup>, Stephen R. Piccolo<sup>1,\*</sup>

5 1 - Department of Biology, Brigham Young University, Provo, UT, USA

6 2 - Department of Laboratory Medicine, University of Washington, Seattle, Washington, USA

7 3 - Division of Medical Genetics, Department of Medicine, University of Washington, Seattle, Washington,  
8 USA

9 4 - Department of Genome Sciences, University of Washington, Seattle, Washington, USA

10 5 - Pharmacy Practice Department, Chapman University School of Pharmacy, Irvine, CA, USA

\* - Please address correspondence to S.R.P. at [stephen\\_piccolo@byu.edu](mailto:stephen_piccolo@byu.edu).

TCGA-AN-A0FL

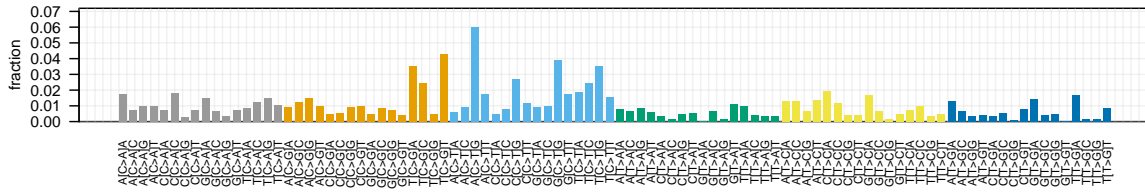

Signature.1A : 0.327 & Signature.3 : 0.364 & Signature.9 : 0.124 & Signature.13 : 0.113

11

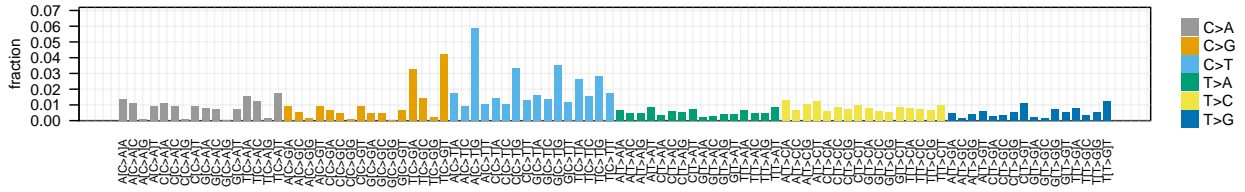

error = 0.052

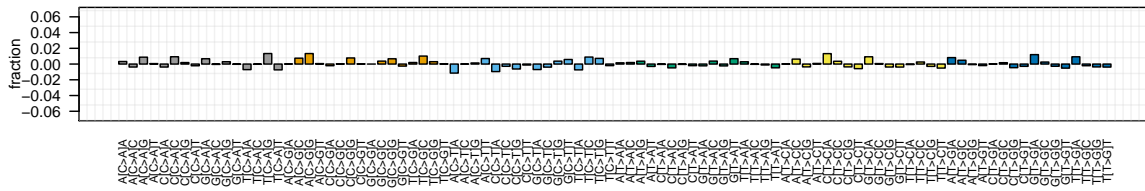

12 **Figure S1: Somatic-mutation signature weights for one Signature 3 tumor.** This tumor had a large proportion of  
 13 C>T mutations, which are representative of Signature 3.

TCGA-E9-A244

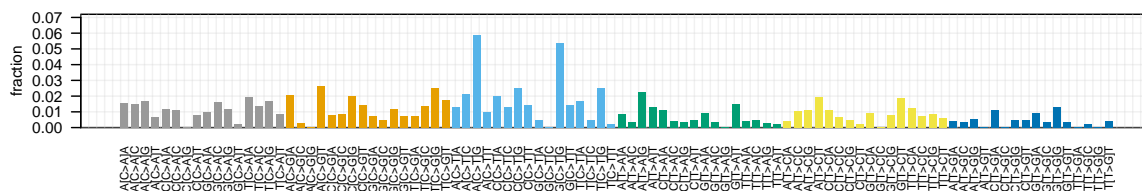

Signature.1A : 0.344 & Signature.3 : 0.577

14

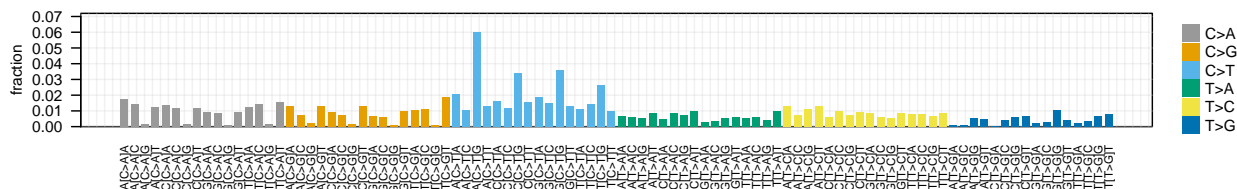

error = 0.069

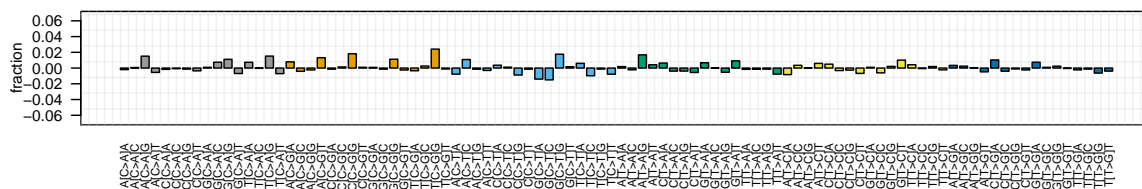

15 **Figure S2: Somatic-mutation signature weights for a second Signature 3 tumor.** This tumor had a large  
 16 proportion of C>T mutations, which are representative of Signature 3.

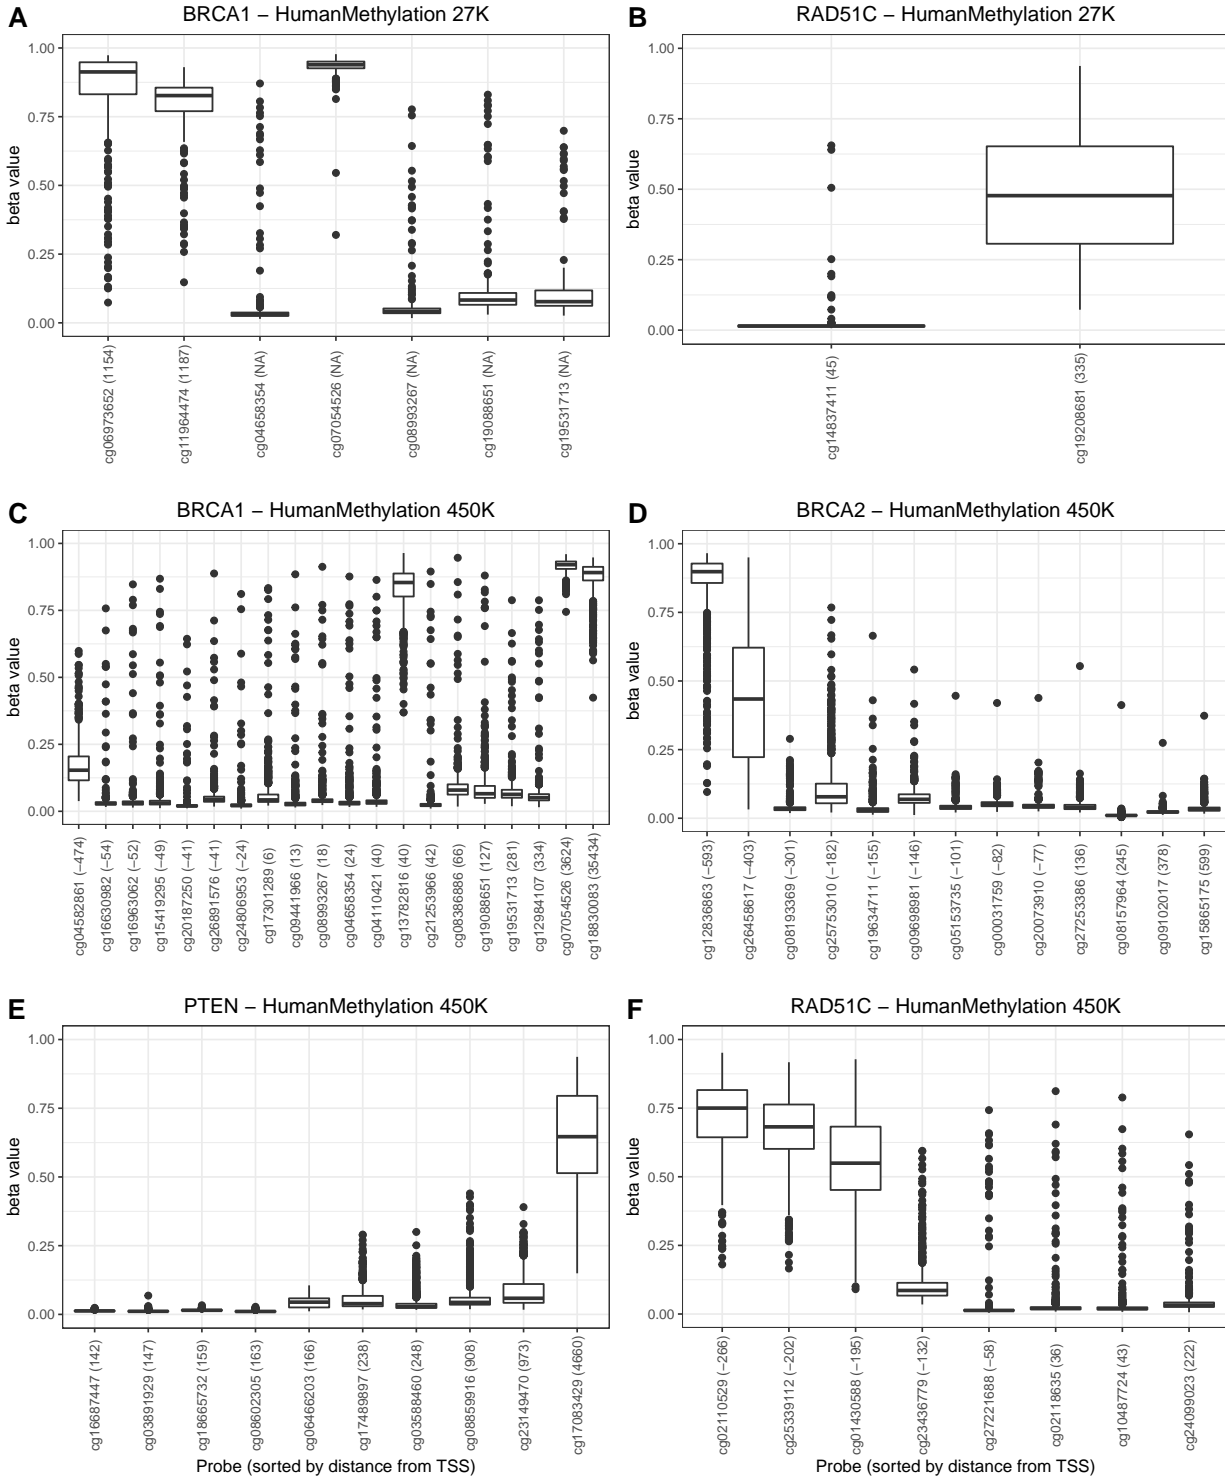

17

18 **Figure S3: Probe-level summarization of DNA methylation probes.** We extracted probe-level methylation (beta)  
 19 values for all available breast-cancer samples in TCGA and plotted them relative to the transcription start site of each  
 20 gene. These graphs illustrate beta values for four genes (*BRCA1*, *BRCA2*, *PTEN*, and *RAD51C*) and two microarray  
 21 platforms (Illumina HumanMethylation 27K and 450K). Values in parenthesis indicate distance from the transcription  
 22 start site (TSS). TSS distances marked as “NA” were unavailable. The 27K arrays have fewer probes per gene. In

23 general, probes near the TSS exhibited relatively low methylation levels for these genes, whereas probes further from  
24 the TSS were more highly methylated. These observations are consistent with these genes' roles as tumor-suppressor  
25 genes, in which we would expect the genes to be "on" by default. Some exceptions to this pattern are apparent (for  
26 example, cg13782816 on panel C); these exceptions may be caused by mismatched probes, cross hybridization, or  
27 misannotations. We calculated gene-level values as the median across all probes that were within 300 nucleotides of the  
28 TSS.

29

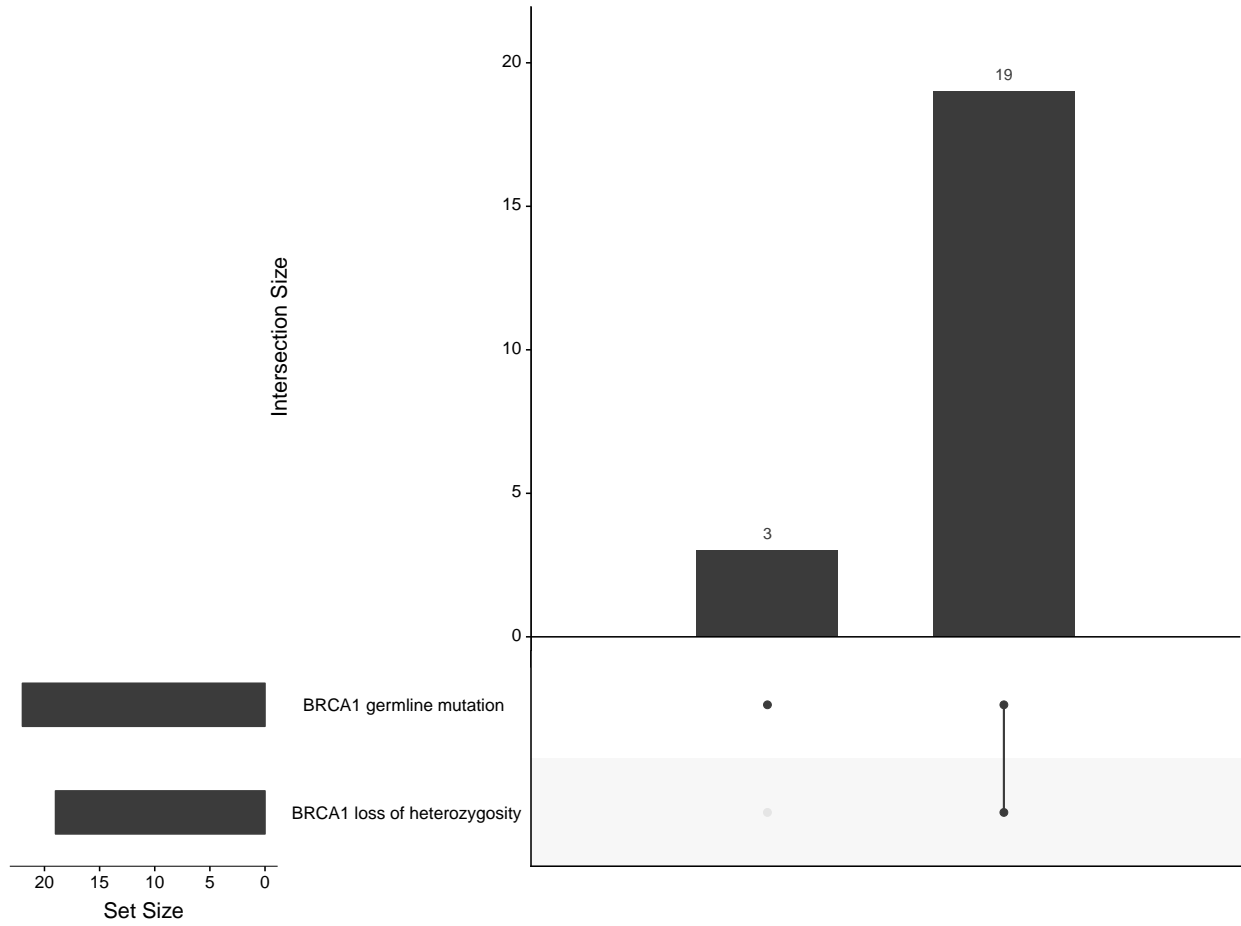

30 **Figure S4: Intersection between germline-mutation status and loss of heterozygosity for *BRCA1*.** A total of 22  
31 patients carried a germline mutation in *BRCA1*. We detected loss-of-heterozygosity events in tumors for all but 3 of  
32 these patients.

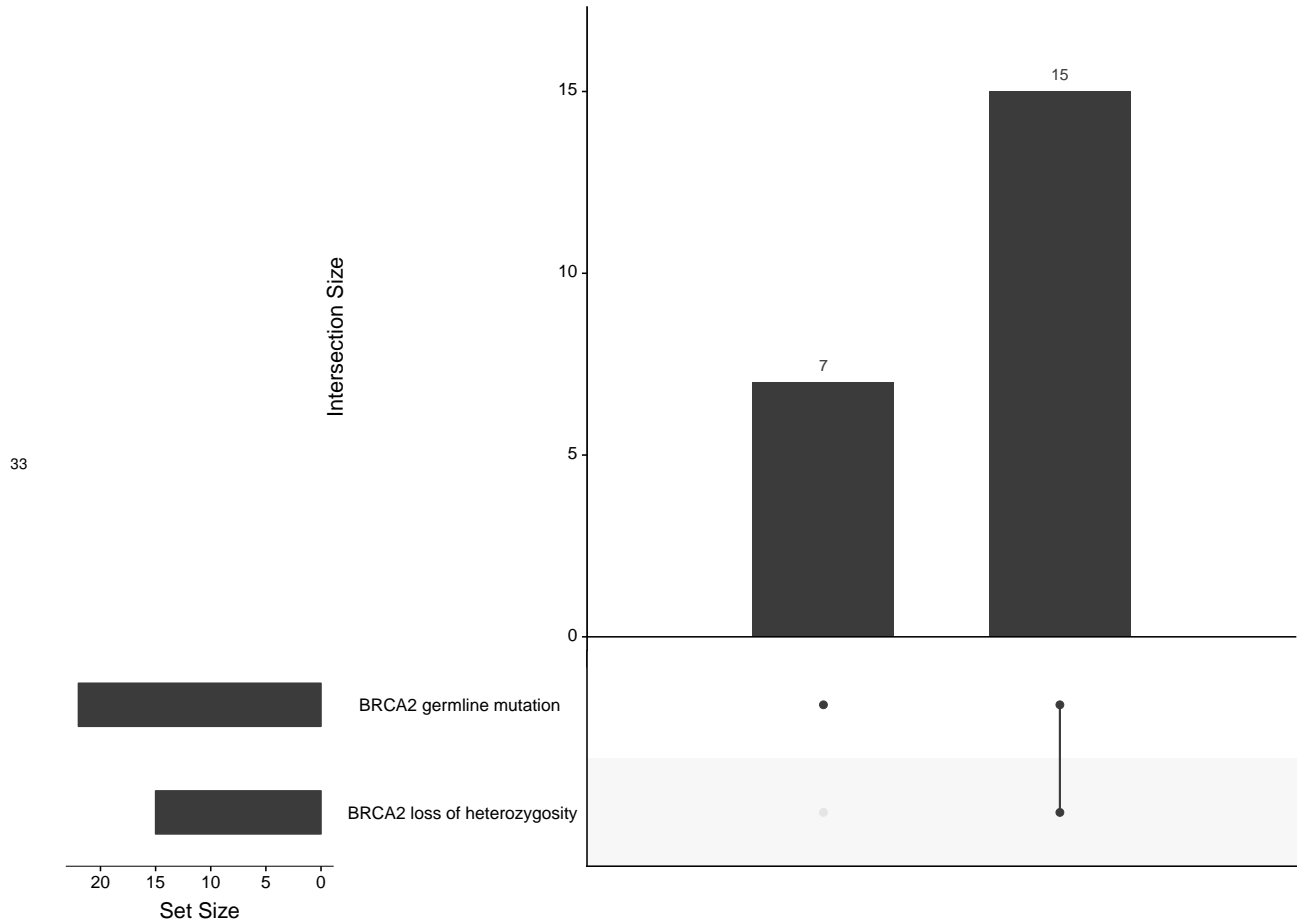

34 **Figure S5: Intersection between germline-mutation status and loss of heterozygosity for *BRCA2*.** A total of 22  
 35 patients carried a germline mutation in *BRCA2*. We detected loss-of-heterozygosity events in tumors from all but 7 of  
 36 these patients.

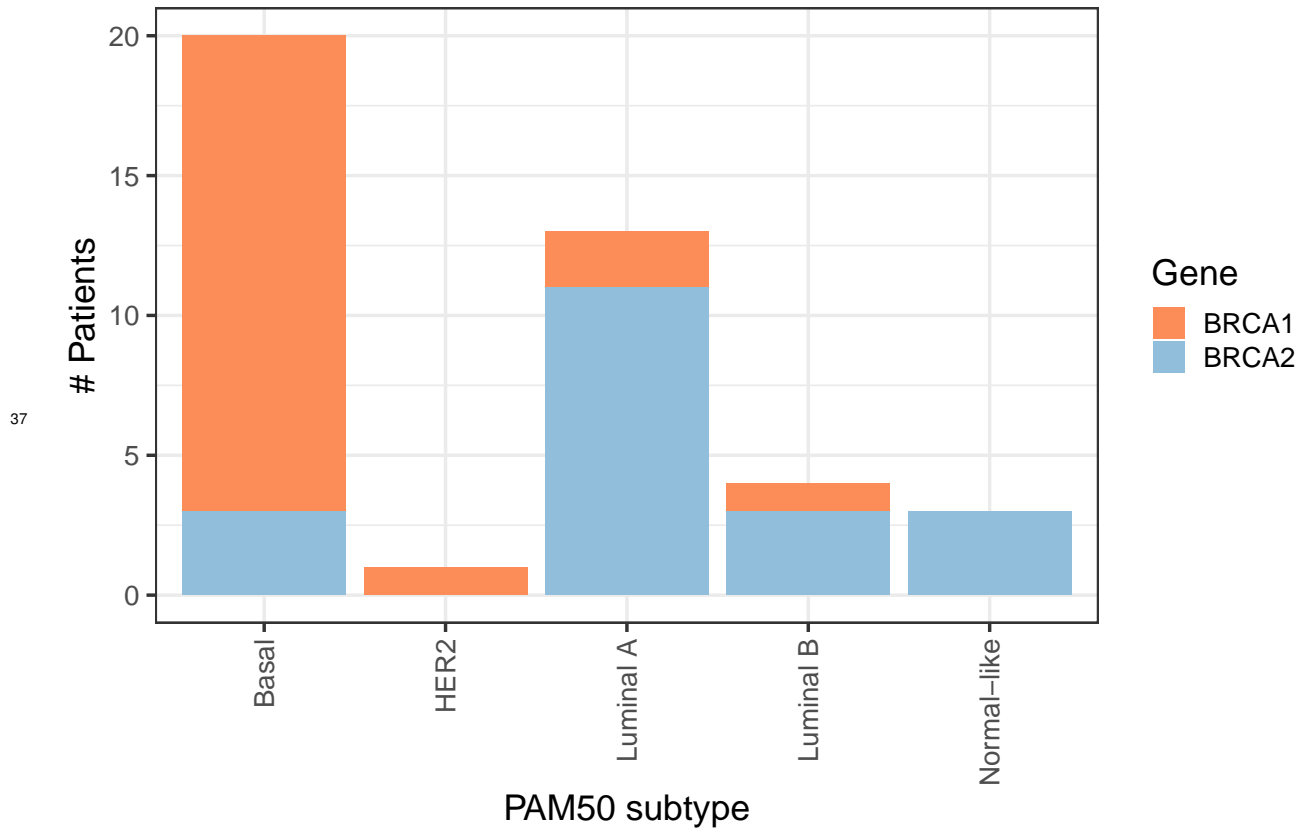

38 **Figure S6: Overlap between *BRCA1/BRCA2* germline-mutation status and PAM50 subtype.**



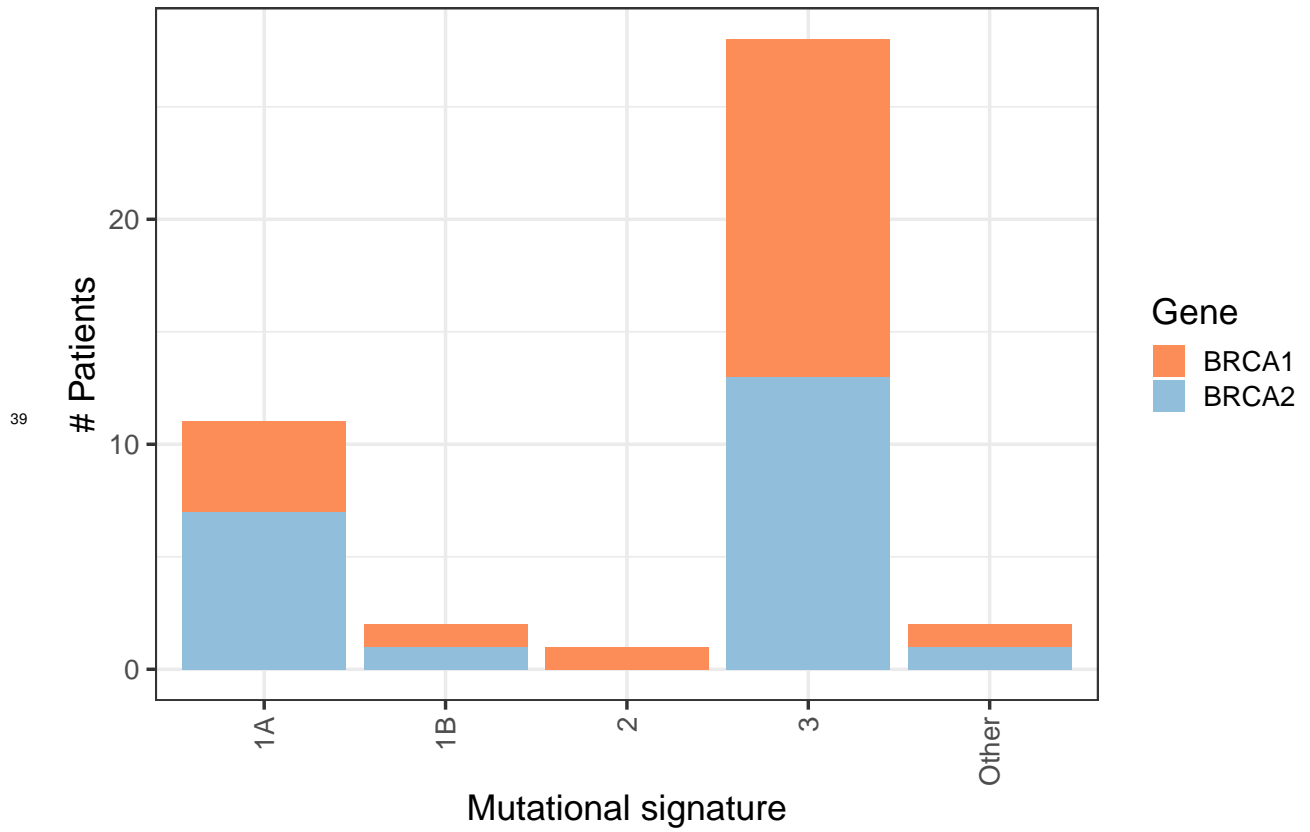

40 **Figure S7: Overlap between *BRCA1/BRCA2* germline-mutation status and primary somatic-mutation**  
 41 **signature.**

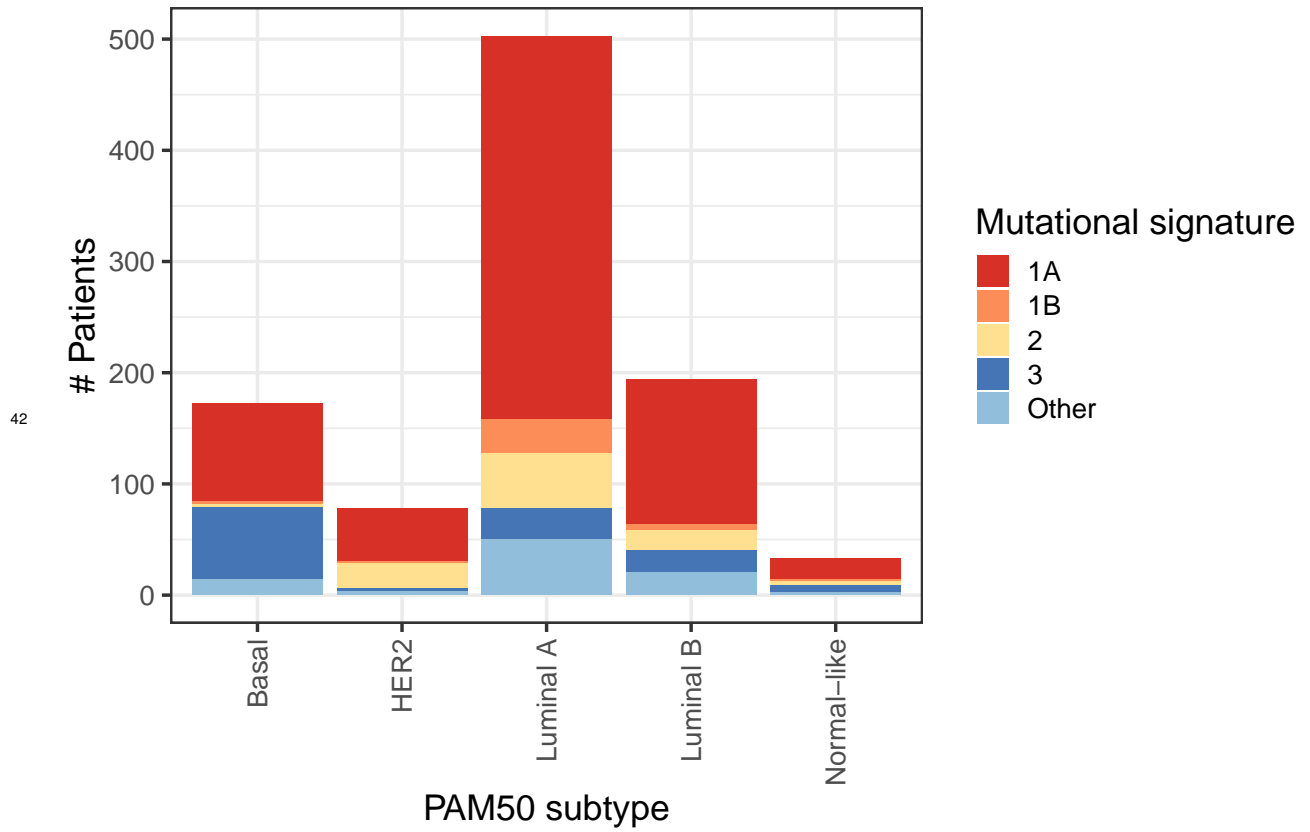

**Figure S8: Overlap between PAM50 and primary somatic-mutation signature.**

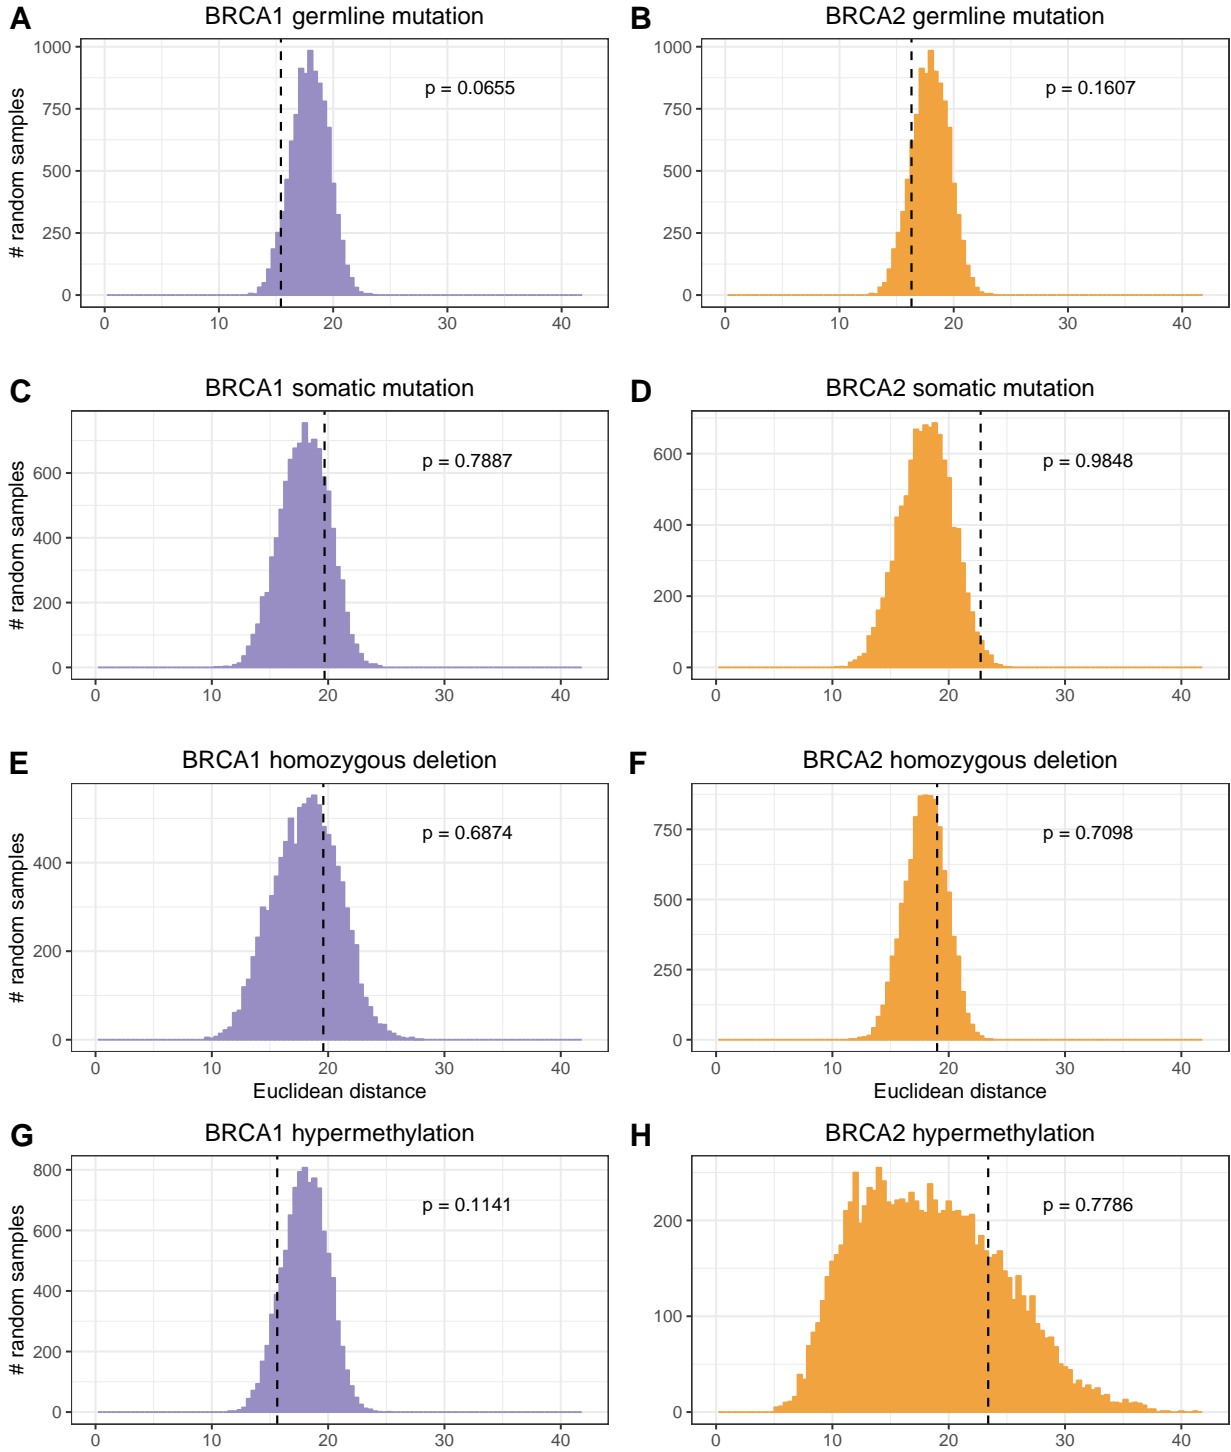

44

45 **Figure S9: Euclidean distances for randomly selected patients compared to actual distances within**  
 46 **BRCA1/BRCA2 patient groups based on PAM50 gene-expression levels.** We calculated the Euclidean distance  
 47 between each pair of individuals who had germline mutations (A, B), somatic mutations (C, D), homozygous deletions  
 48 (E, F), or hypermethylation events (G, H) in *BRCA1* or *BRCA2*; the medians of these distances are illustrated using  
 49 vertical, dashed lines. We then randomized the patient identifiers and calculated pairwise distances for the same number

50 of randomly selected patients, which resulted in an empirical null distribution. We calculated p-values by comparing  
51 the actual distances against the randomized distances.

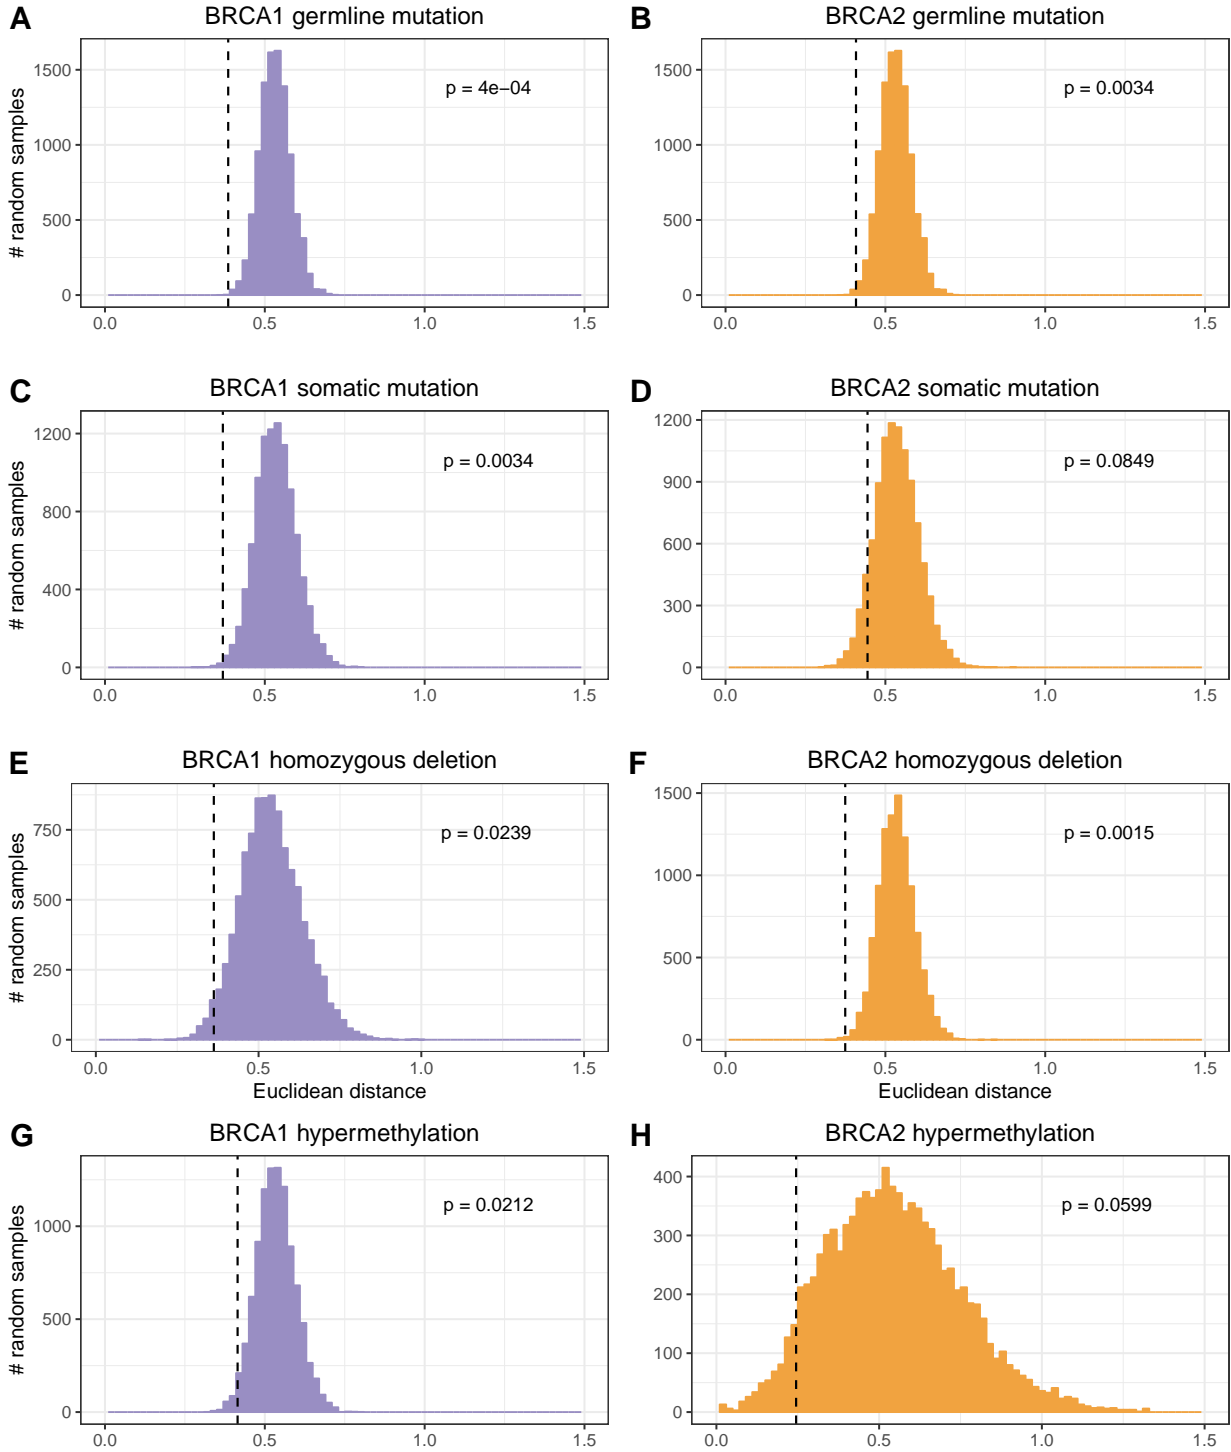

52

53 **Figure S10: Euclidean distances for randomly selected patients compared to actual distances within**  
 54 **BRCA1/BRCA2 patient groups based on somatic-mutation signatures.** We calculated the Euclidean distance  
 55 between each pair of individuals who had germline mutations (A, B), somatic mutations (C, D), homozygous deletions  
 56 (E, F), or hypermethylation events (G, H) in *BRCA1* or *BRCA2*; the medians of these distances are illustrated using  
 57 vertical, dashed lines. We then randomized the patient identifiers and calculated pairwise distances for the same number

58 of randomly selected patients, which resulted in an empirical null distribution. We calculated p-values by comparing  
59 the actual distances against the randomized distances.

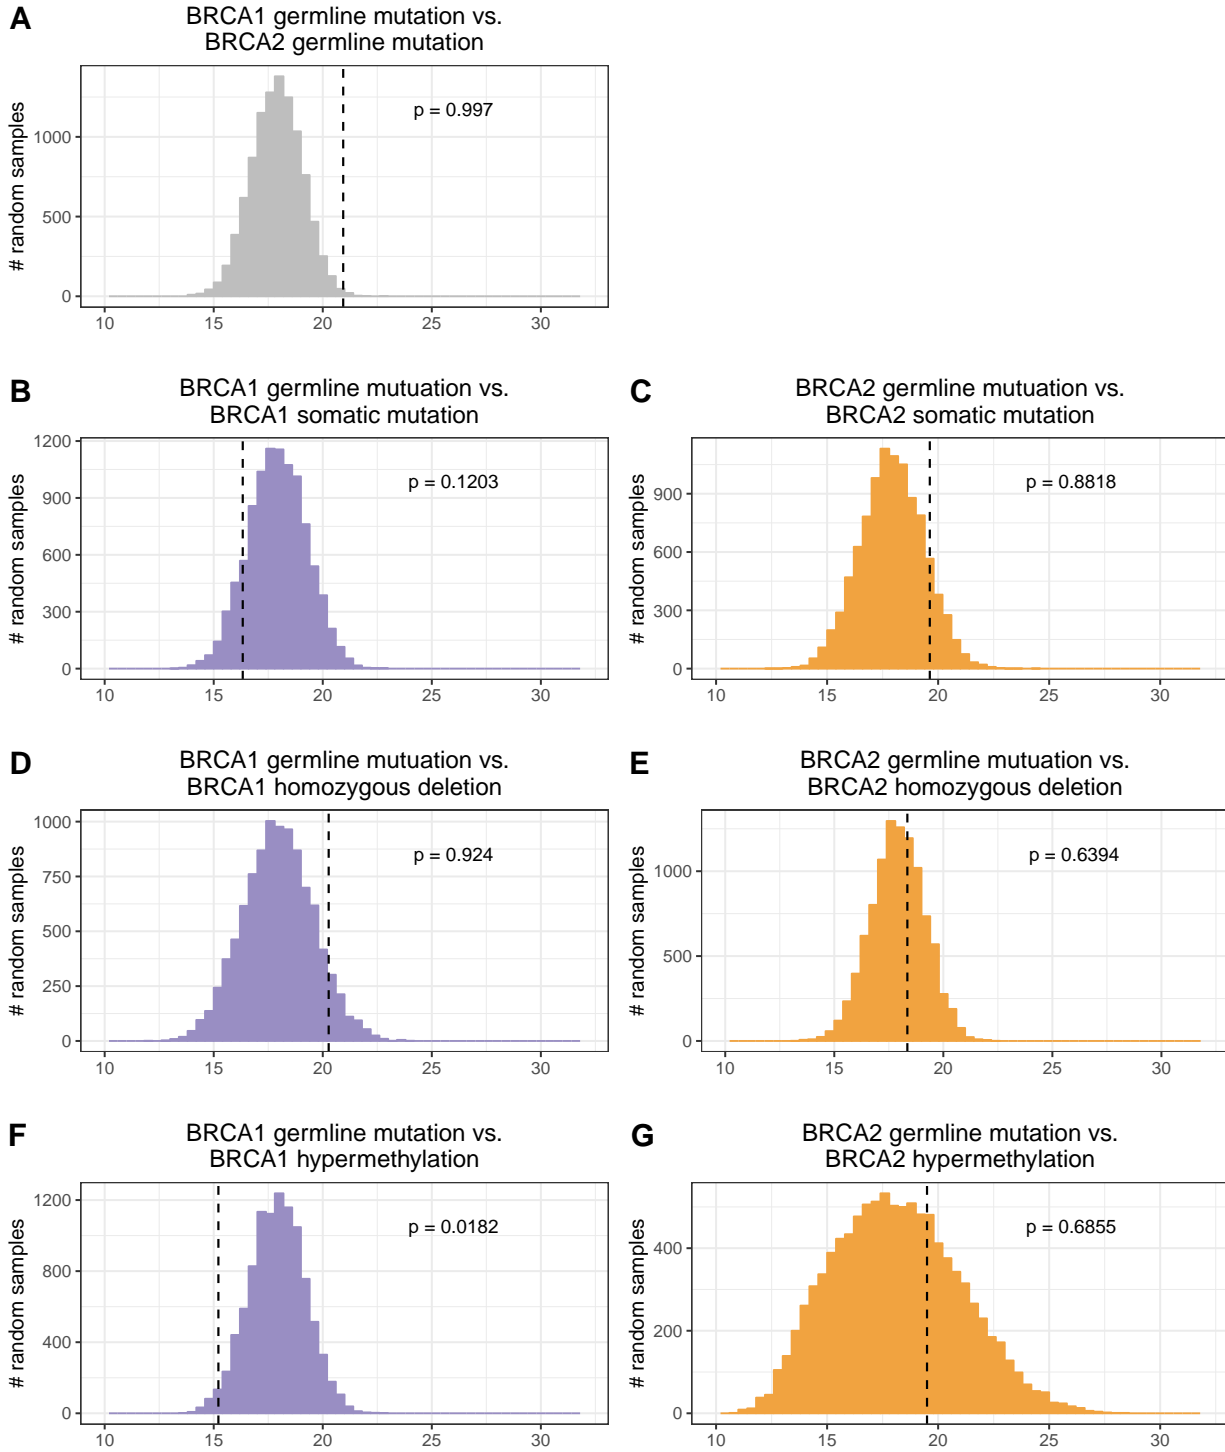

60

61 **Figure S11: PAM50-based Euclidean distances for randomly selected patient pairs compared to actual**  
 62 **distances between patient pairs for individuals with *BRCA1/BRCA2* aberrations.** We identified patients who had  
 63 a germline mutation in *BRCA1* or *BRCA2* and compared them against each other (A), those with a somatic mutation in  
 64 the same gene (B-C), those with a homozygous deletion in the same gene (D-E) and those with DNA hypermethylation  
 65 of the same gene (F-G). We calculated the Euclidean distance between each pair of individuals in these groups; these

66 distances are illustrated using vertical, dashed lines. We then randomized the patient identifiers and calculated pairwise  
67 distances for groups of randomly selected patients, which resulted in an empirical null distribution. We calculated  
68 p-values by comparing the actual distances against the randomized distances.



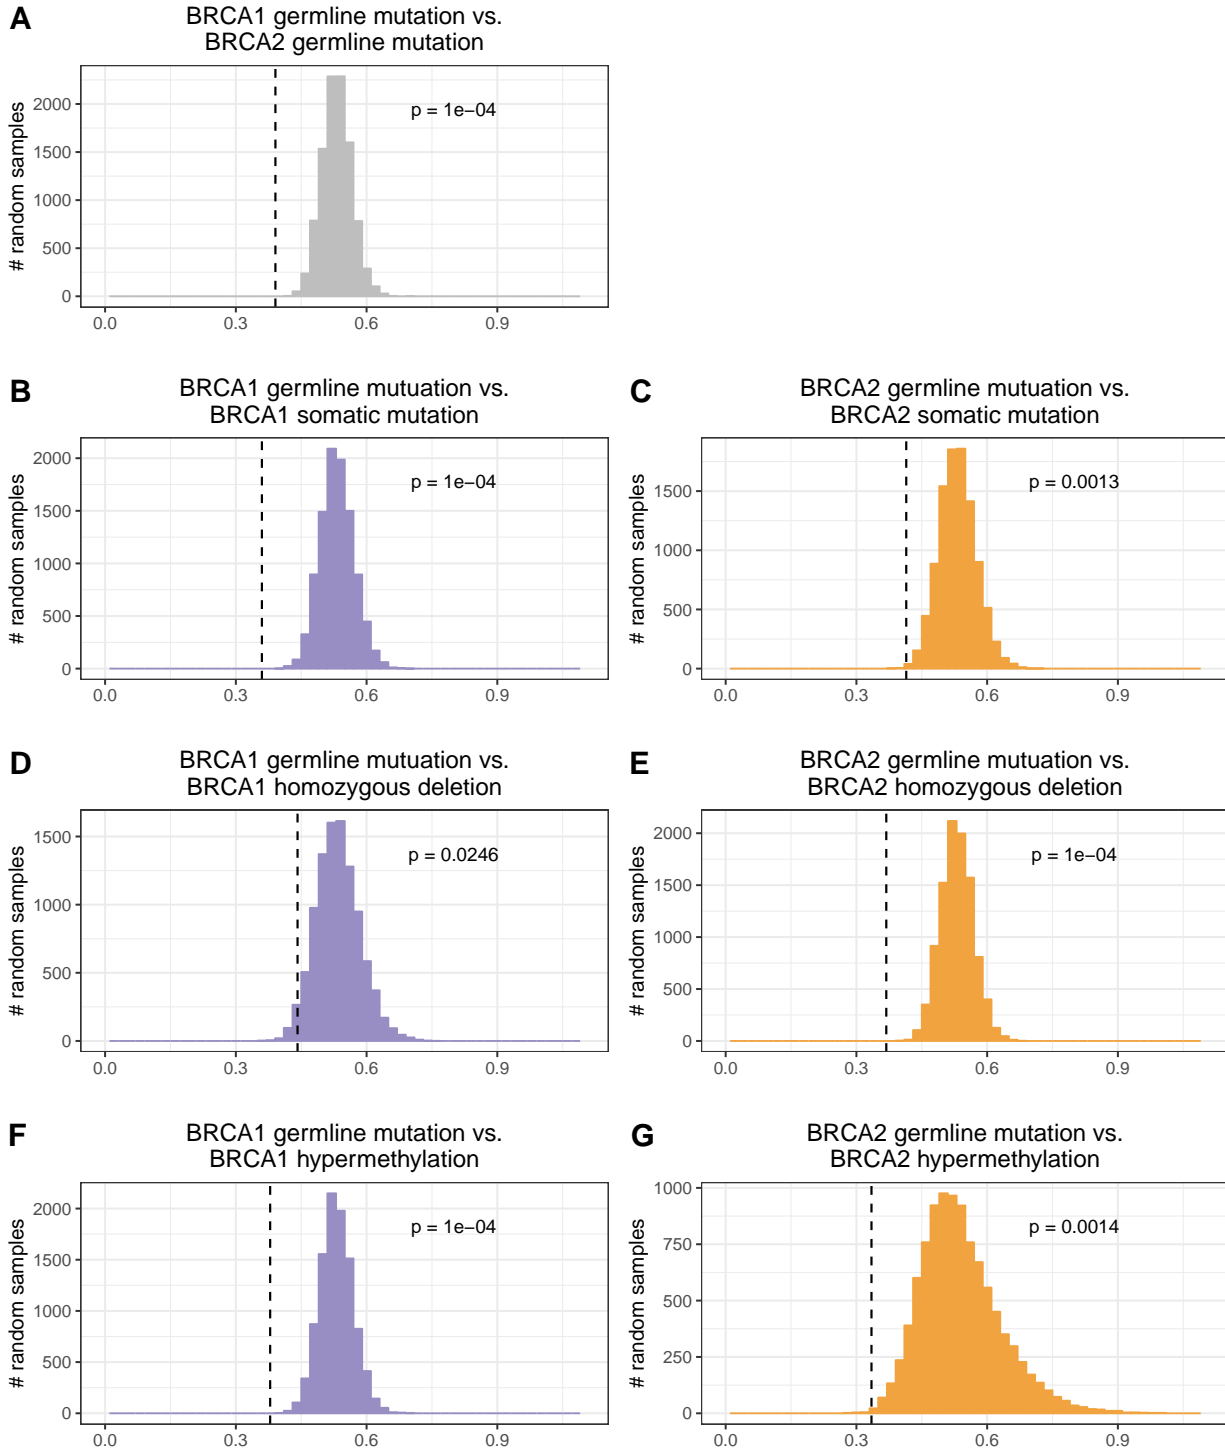

69

70 **Figure S12: Somatic-mutation signature-based Euclidean distances for randomly selected patient pairs**  
 71 **compared to actual distances between patient pairs for individuals with *BRCA1/BRCA2* aberrations.** We  
 72 identified patients who had a germline mutation in *BRCA1* or *BRCA2* and compared them against each other (A), those  
 73 with a somatic mutation in the same gene (B-C), those with a homozygous deletion in the same gene (D-E) and those  
 74 with DNA hypermethylation of the same gene (F-G). We calculated the Euclidean distance between each pair of

75 individuals in these groups; these distances are illustrated using vertical, dashed lines. We then randomized the patient  
76 identifiers and calculated pairwise distances for groups of randomly selected patients, which resulted in an empirical  
77 null distribution. We calculated p-values by comparing the actual distances against the randomized distances.

78

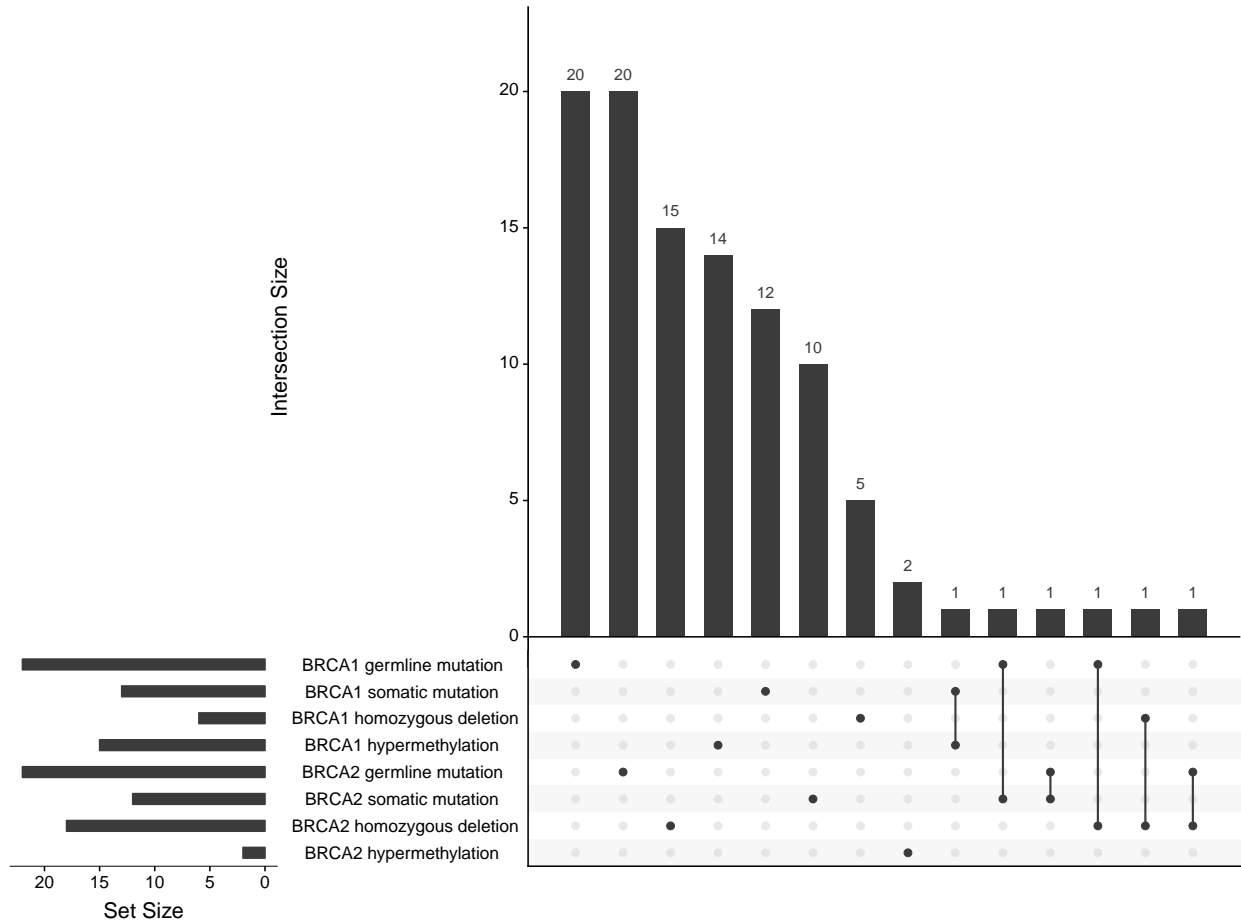

79 **Figure S13: Intersection between different types of molecular aberration in *BRCA1* and *BRCA2*.** This graph  
 80 indicates how many patients had each type of molecular aberration and the level of overlap among these aberrations  
 81 within a given patient. In most cases, these aberrations were mutually exclusive from each other; however, some  
 82 overlap did occur. For example, one patient had a somatic mutation in *BRCA1* and hypermethylation of the same gene.  
 83 This graph only depicts patients for which all four types of molecular data were available.

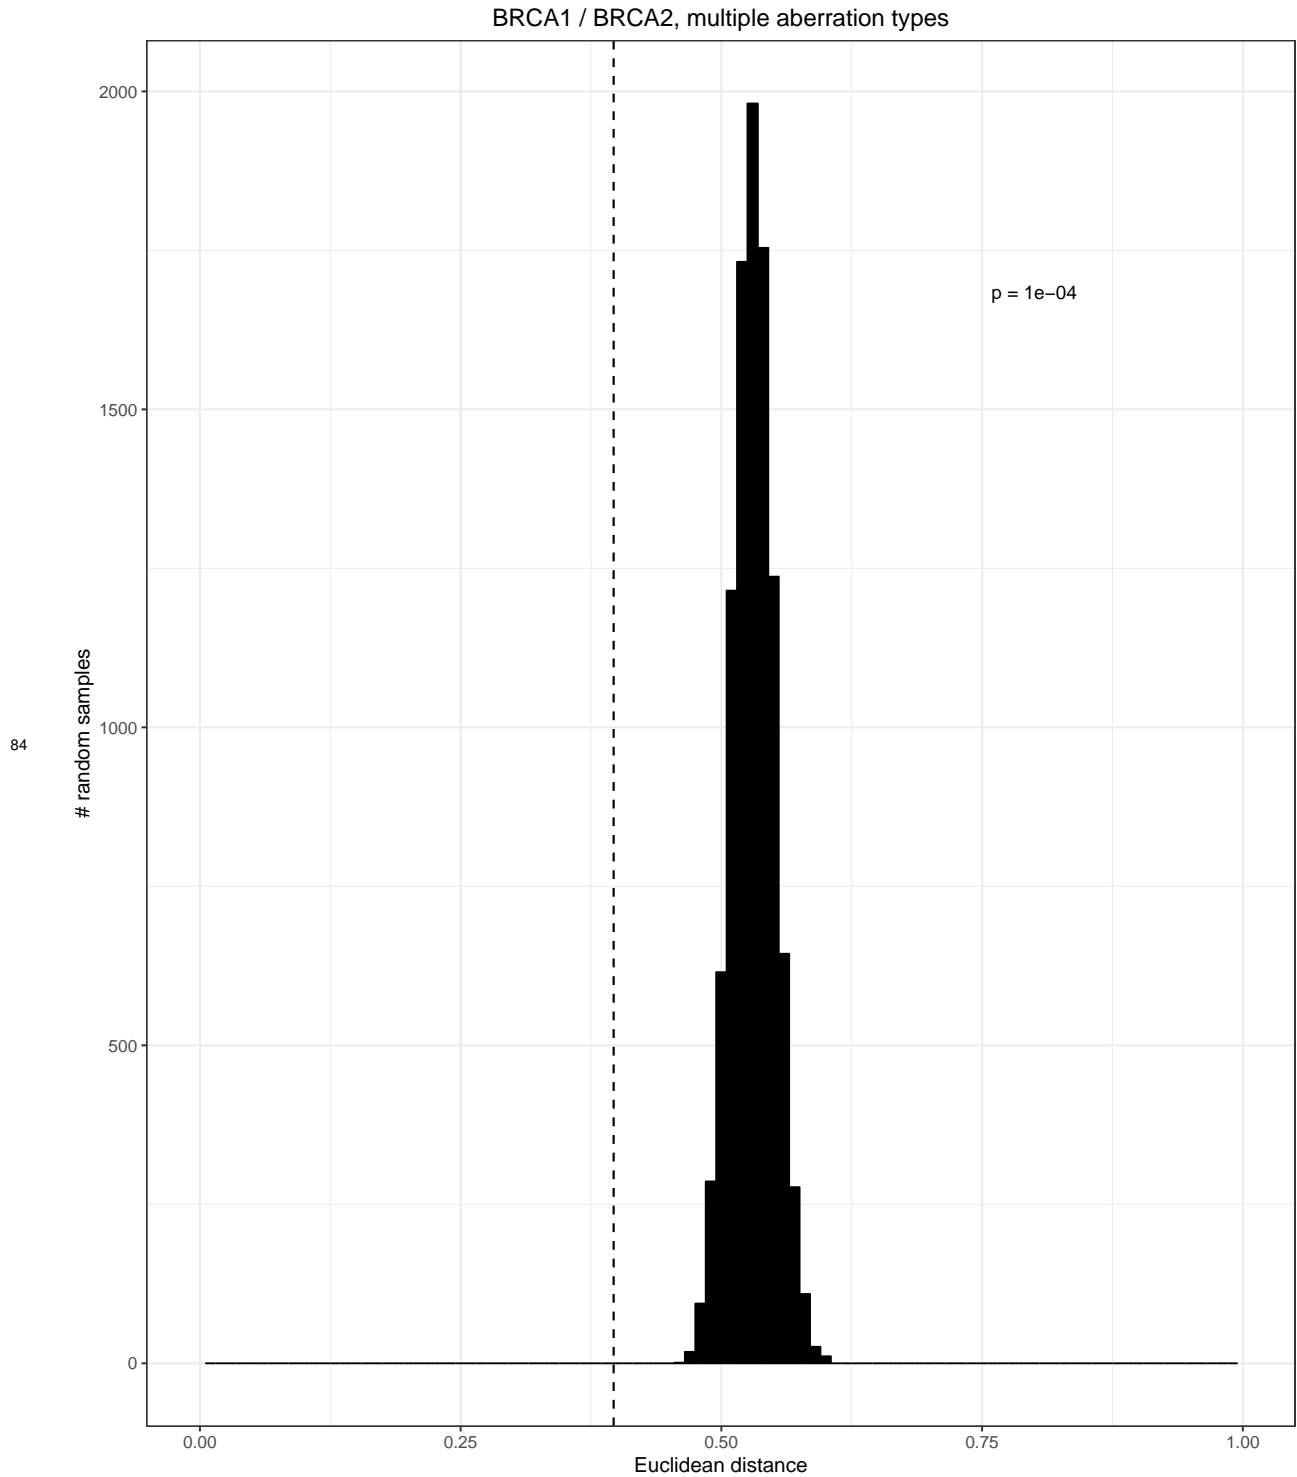

85 **Figure S14: Euclidean distances for randomly selected patients compared to actual distances across all**  
 86 **patients with a *BRCA1* or *BRCA2* aberration based on PAM50 gene-expression levels.** We calculated the  
 87 Euclidean distance between each pair of individuals who had a germline mutation, somatic mutation, homozygous  
 88 deletion, and/or hypermethylation event in *BRCA1* and/or *BRCA2*; the median of these distances is illustrated using a  
 89 vertical, dashed line. We then randomized the patient identifiers and calculated pairwise distances for the same number

90 of randomly selected patients, which resulted in an empirical null distribution. We calculated a p-value by comparing  
91 the actual distance against the randomized distances.

## Germline mutations

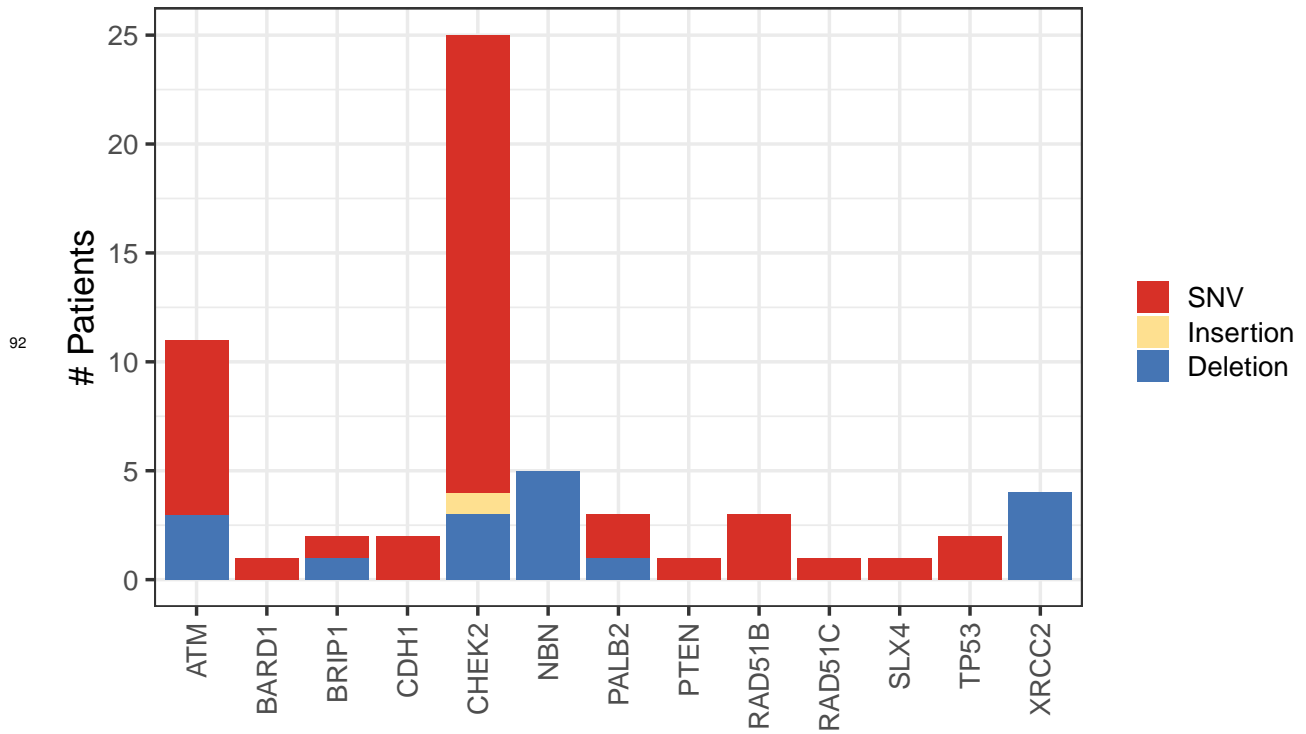

<sup>93</sup> **Figure S15: Number of patients with germline mutations in non-BRCA cancer-predisposition genes.** This  
<sup>94</sup> graph omits genes in which we observed no germline mutations. SNV = single-nucleotide variant.

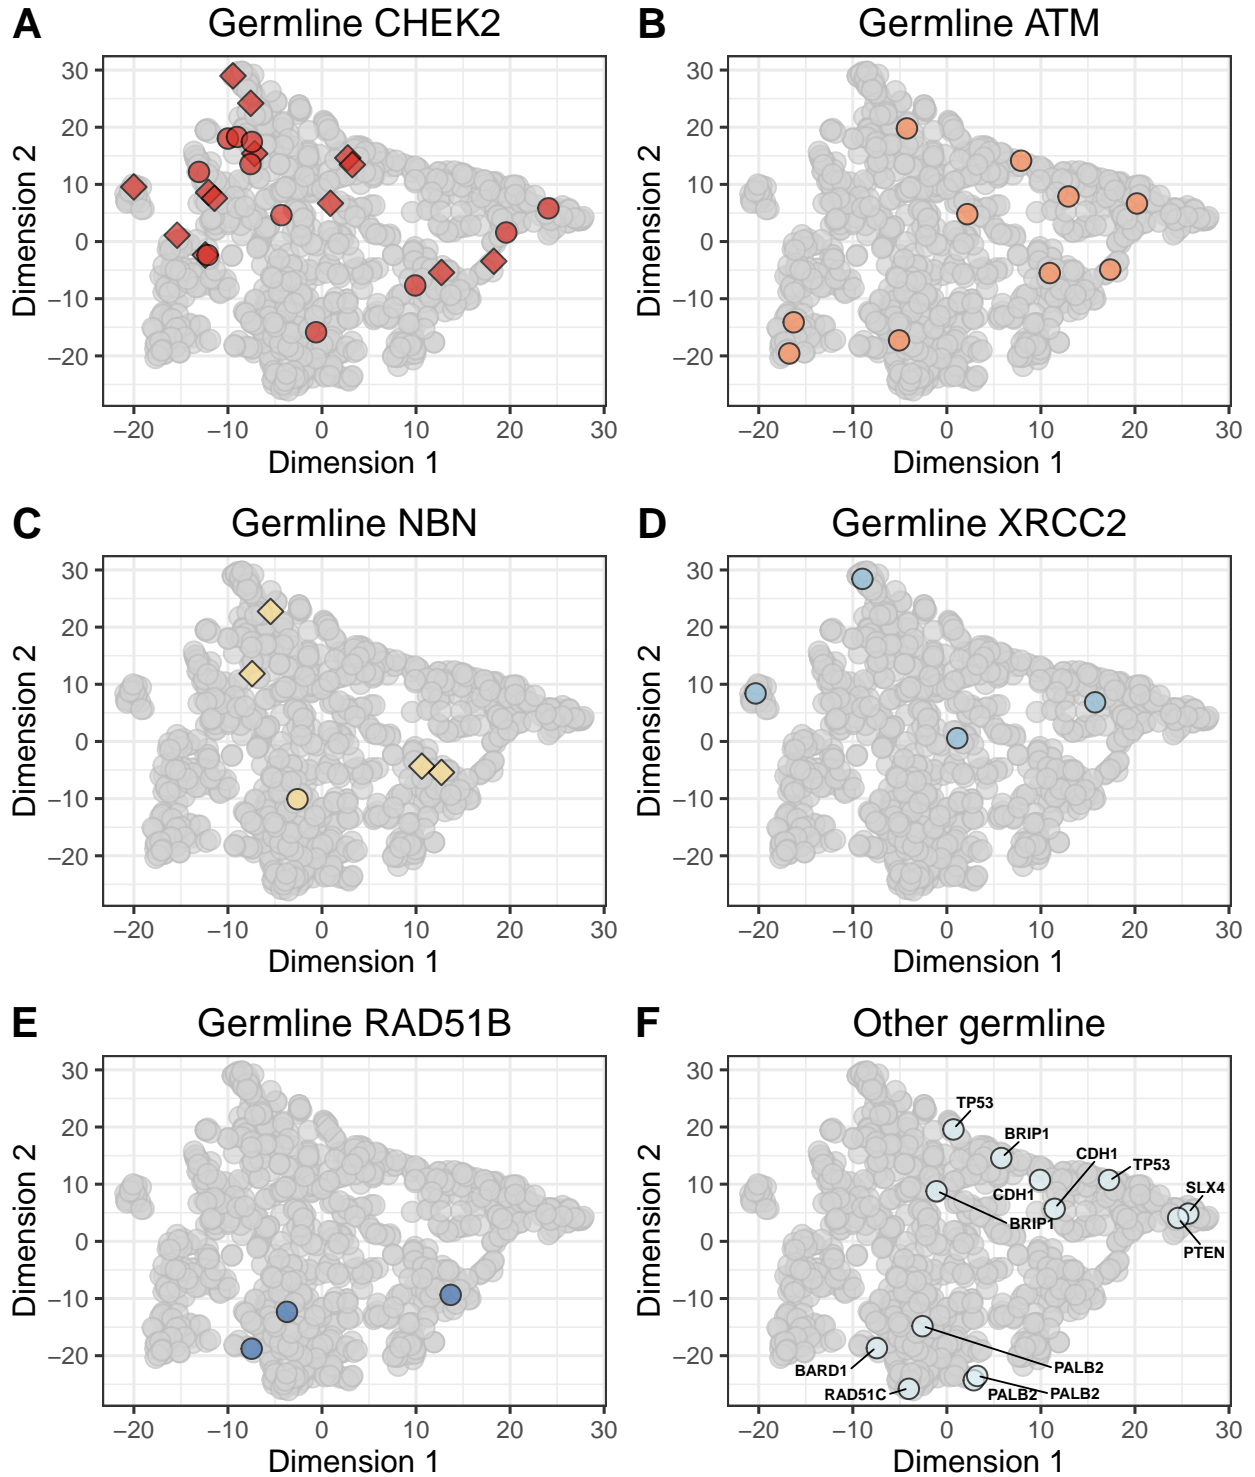

96 **Figure S16: Non-BRCA germline mutations on the somatic-mutation signature landscape.** Using the same  
 97 two-dimensional representation of mutational signatures shown in Figure 3, this plot indicates which patients had  
 98 germline mutations in non-BRCA cancer-predisposition genes.

## Somatic mutations

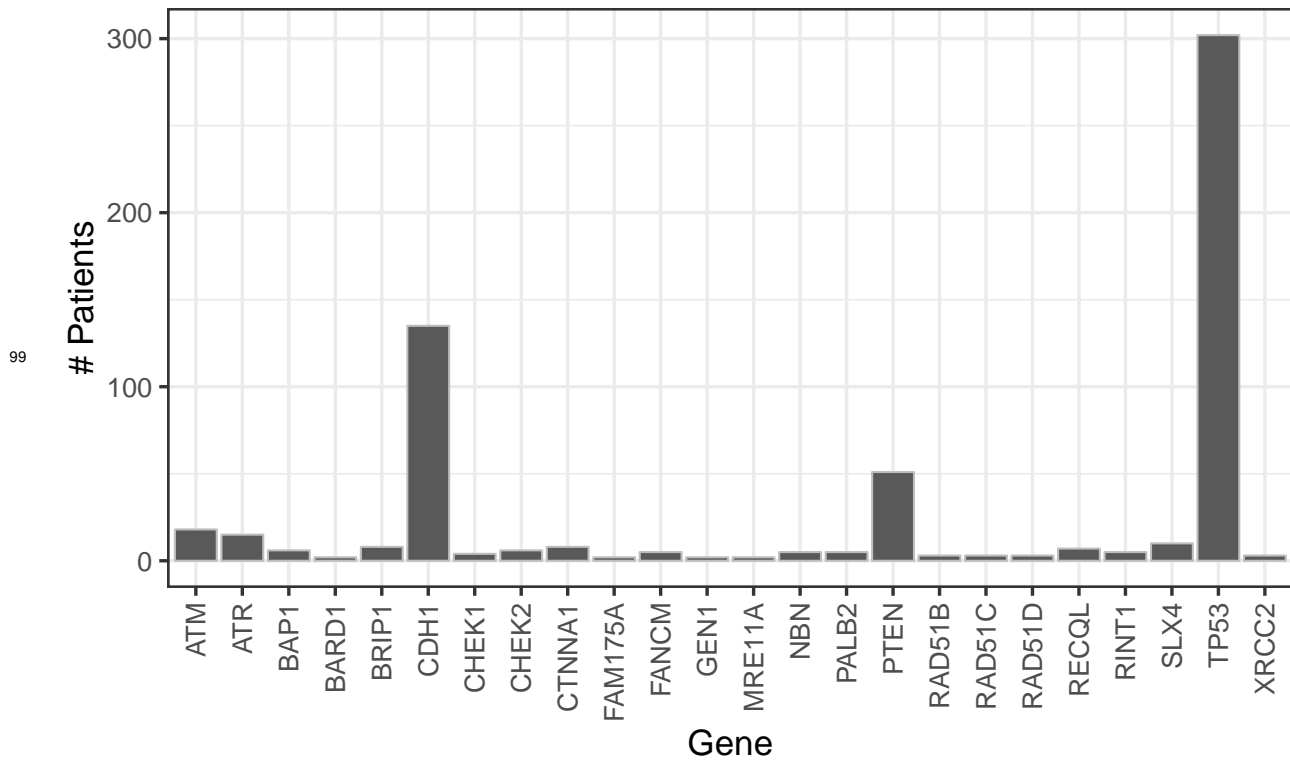

100 **Figure S17: Number of patients with somatic mutations in non-BRCA cancer-predisposition genes.** This graph  
101 omits genes in which we observed no somatic mutations.



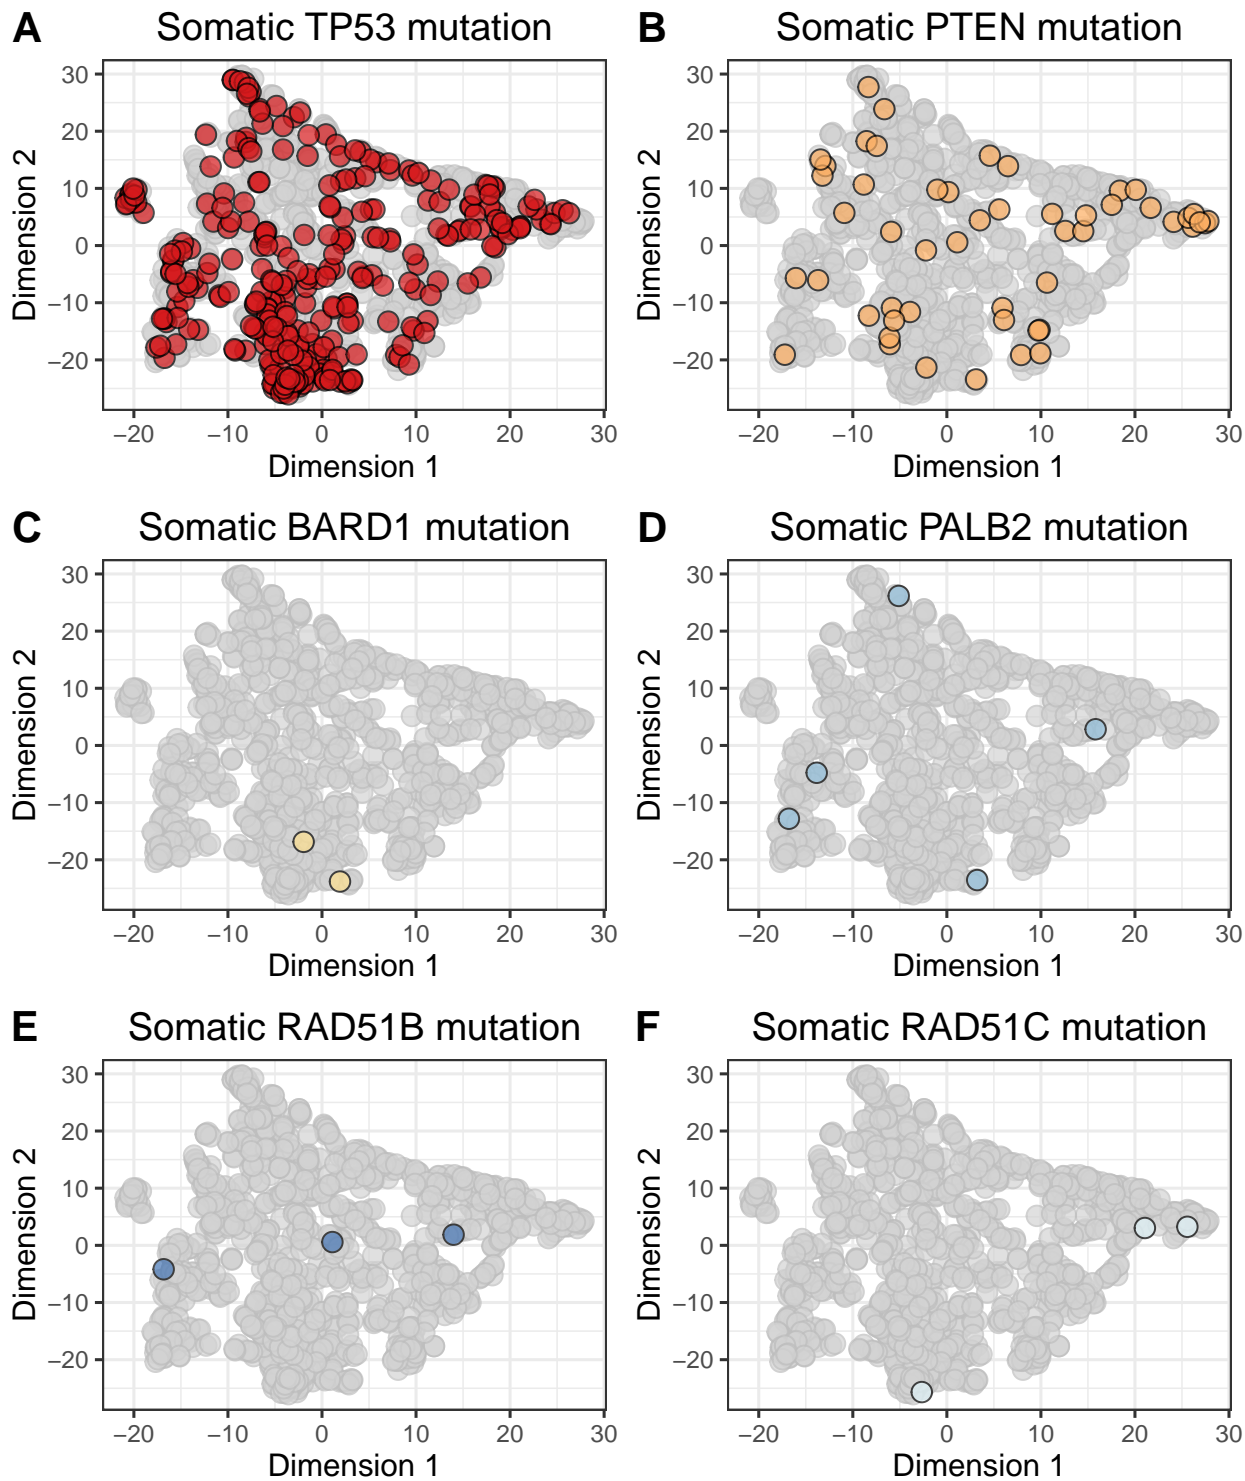

102

103 **Figure S18: Non-BRCA somatic mutations on the somatic-mutation signature landscape.** Using the same  
 104 two-dimensional representation of mutational signatures shown in Figure 3, this plot indicates which patients had  
 105 somatic mutations in non-BRCA cancer-predisposition genes.

## Copy number alterations

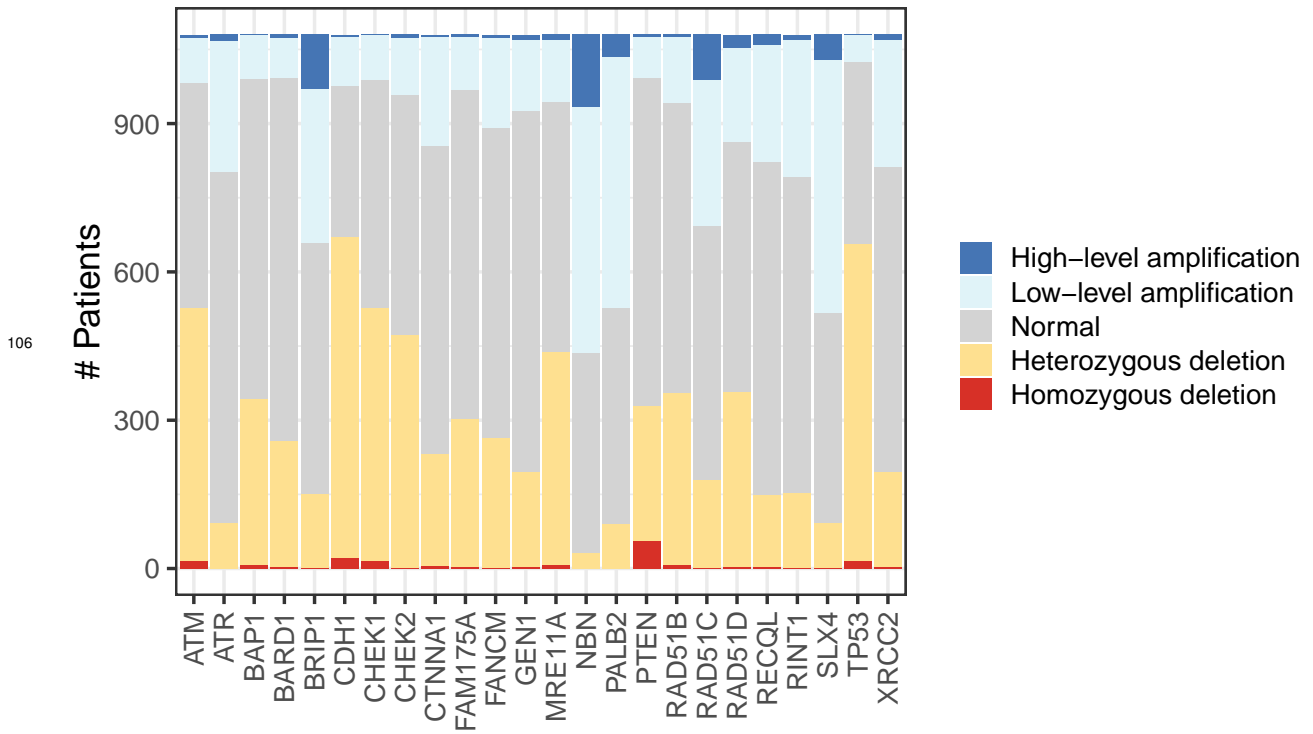

107 **Figure S19: Number of patients with homozygous deletions in non-BRCA cancer-predisposition genes.** This  
 108 graph omits genes in which we observed no homozygous deletions.

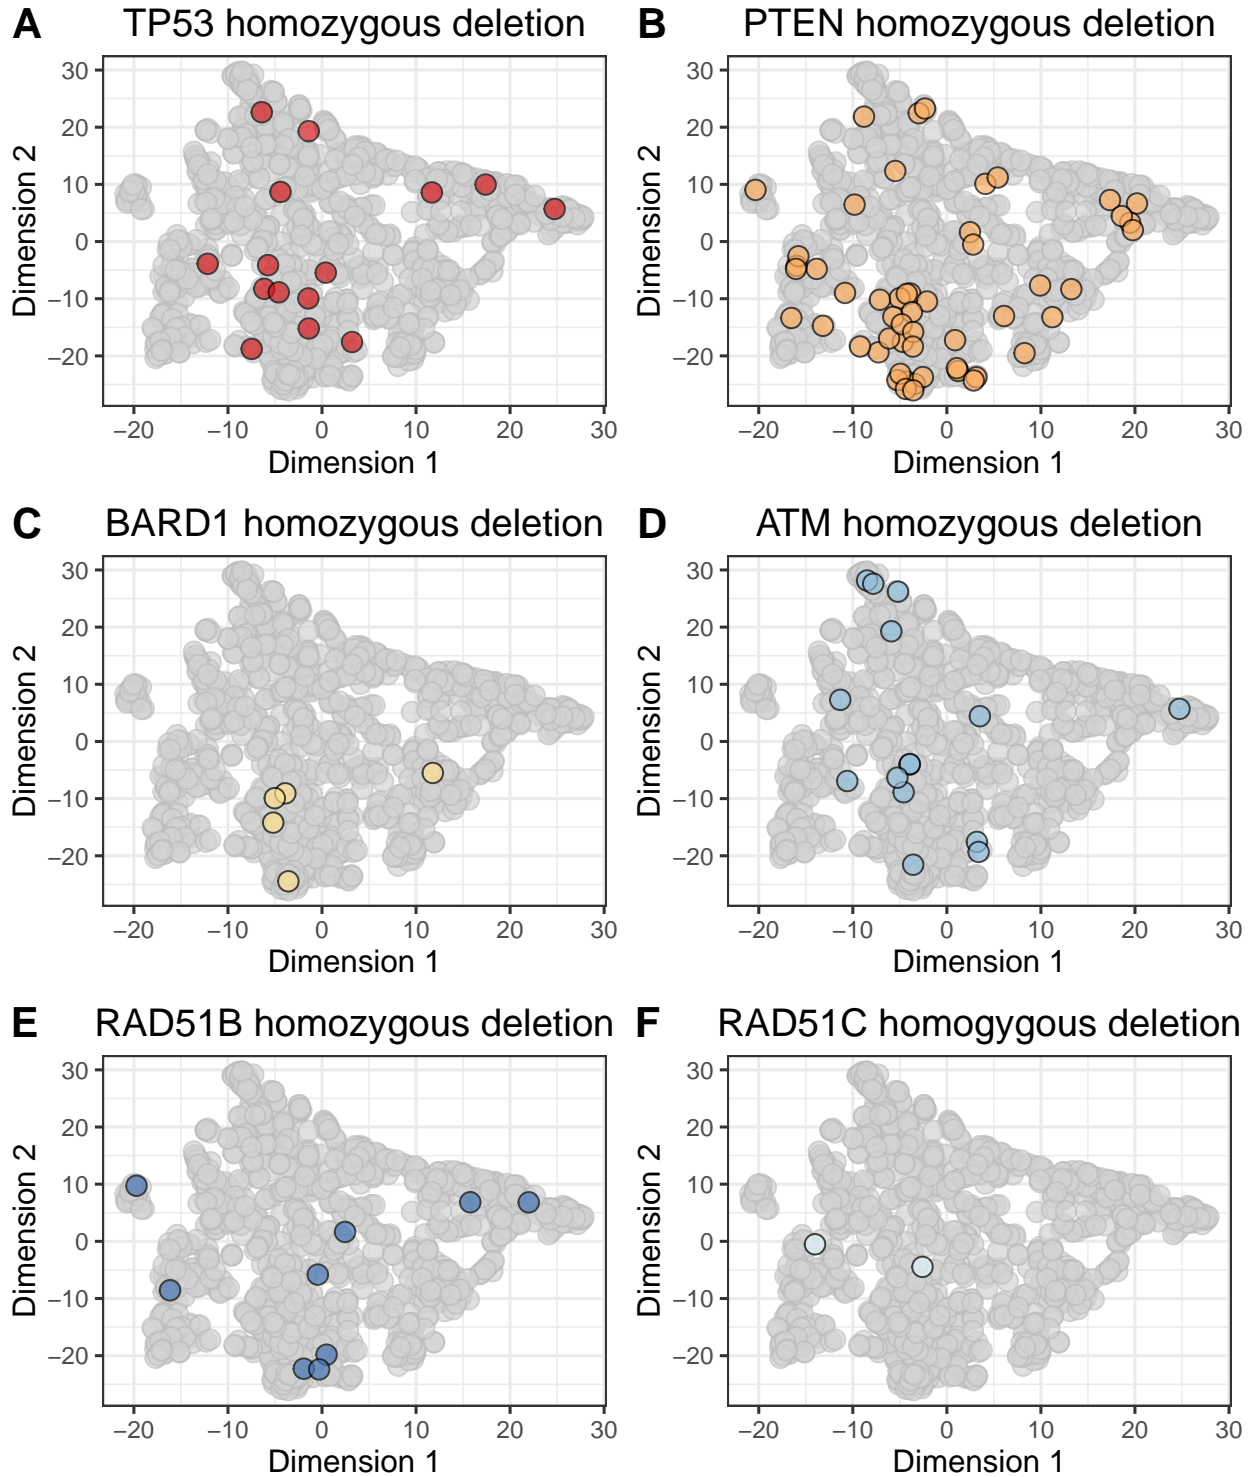

109

110 **Figure S20: Non-BRCA homozygous deletions on the somatic-mutation signature landscape.** Using the same  
 111 two-dimensional representation of mutational signatures shown in Figure 3, this plot indicates which patients had  
 112 homozygous deletions in non-BRCA cancer-predisposition genes.

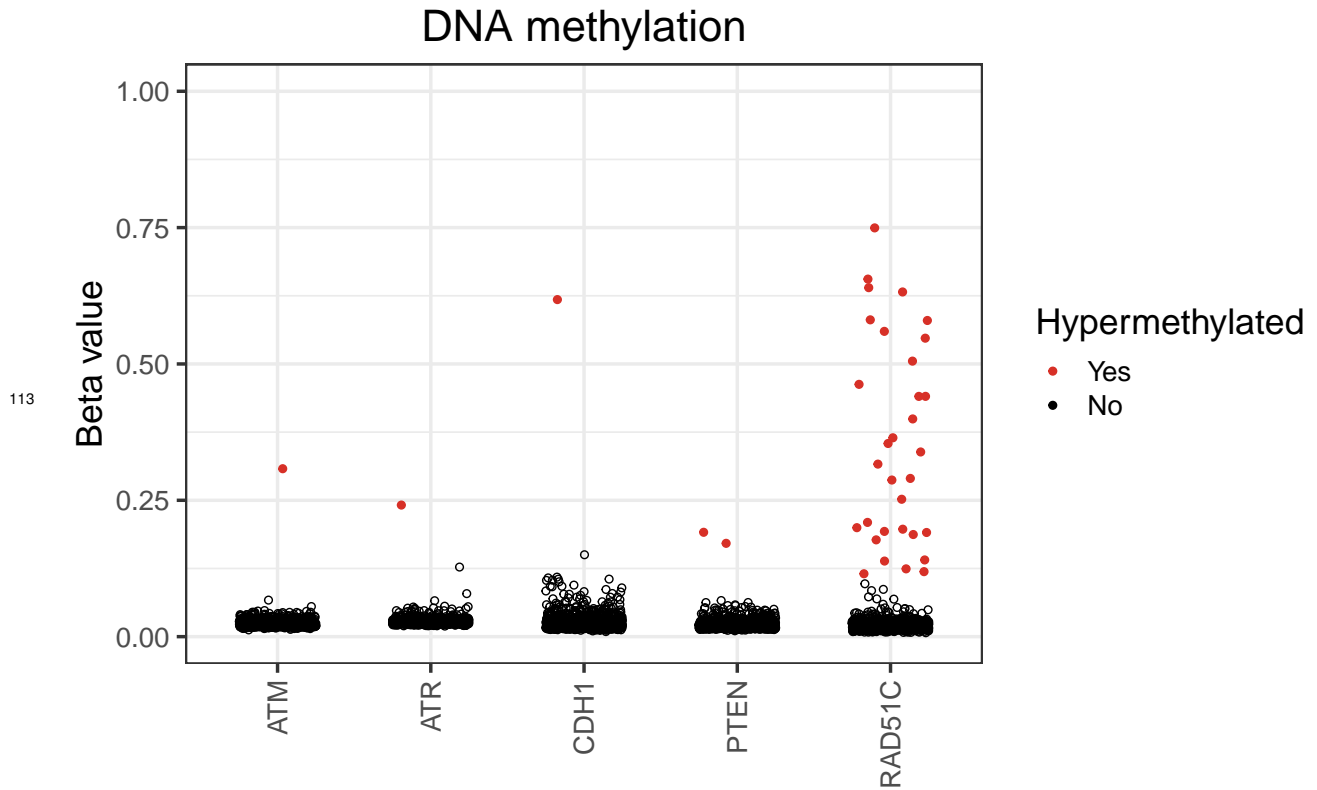

114 **Figure S21: DNA methylation (beta) values for non-BRCA cancer-predisposition genes.** Tumors that we  
 115 classified as having hypermethylation events are highlighted as red points. This graph omits genes in which we  
 116 observed no hypermethylation events.

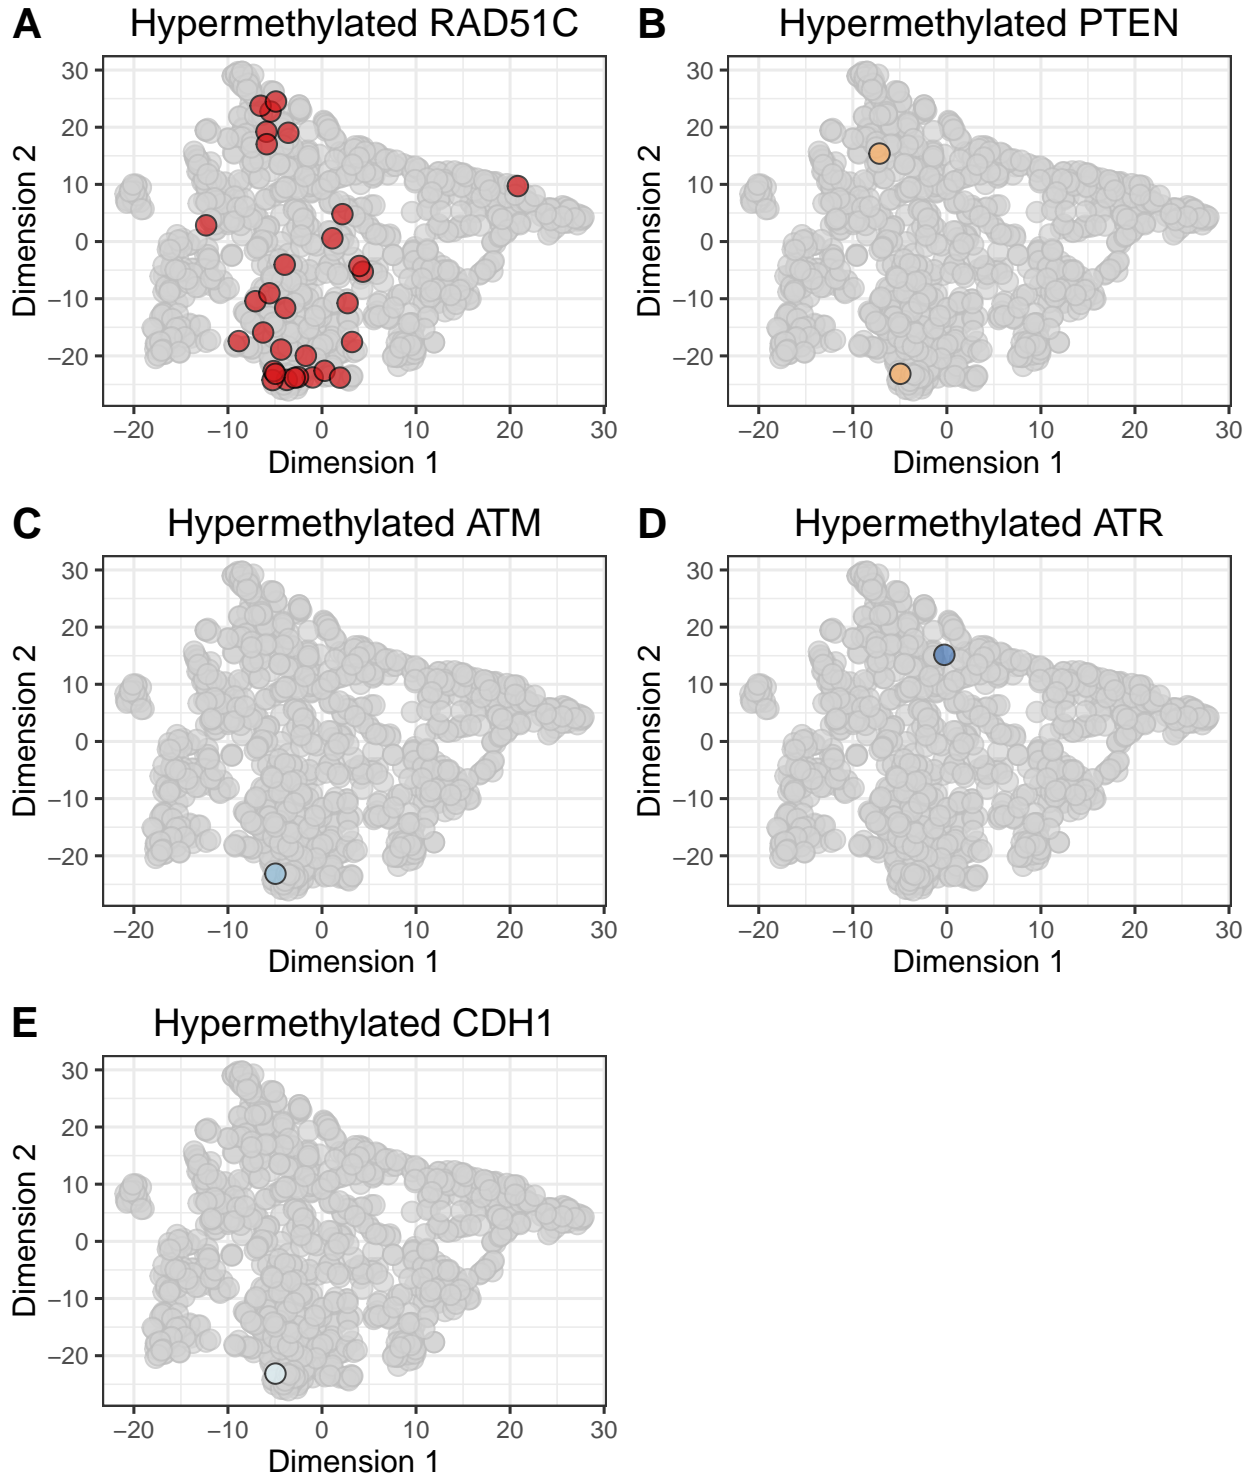

117

118 **Figure S22: Non-BRCA hypermethylation events on the somatic-mutation signature landscape.** Using the same  
 119 two-dimensional representation of mutational signatures shown in Figure 3, this plot indicates which patients had  
 120 hypermethylation events in non-BRCA cancer-predisposition genes.

121

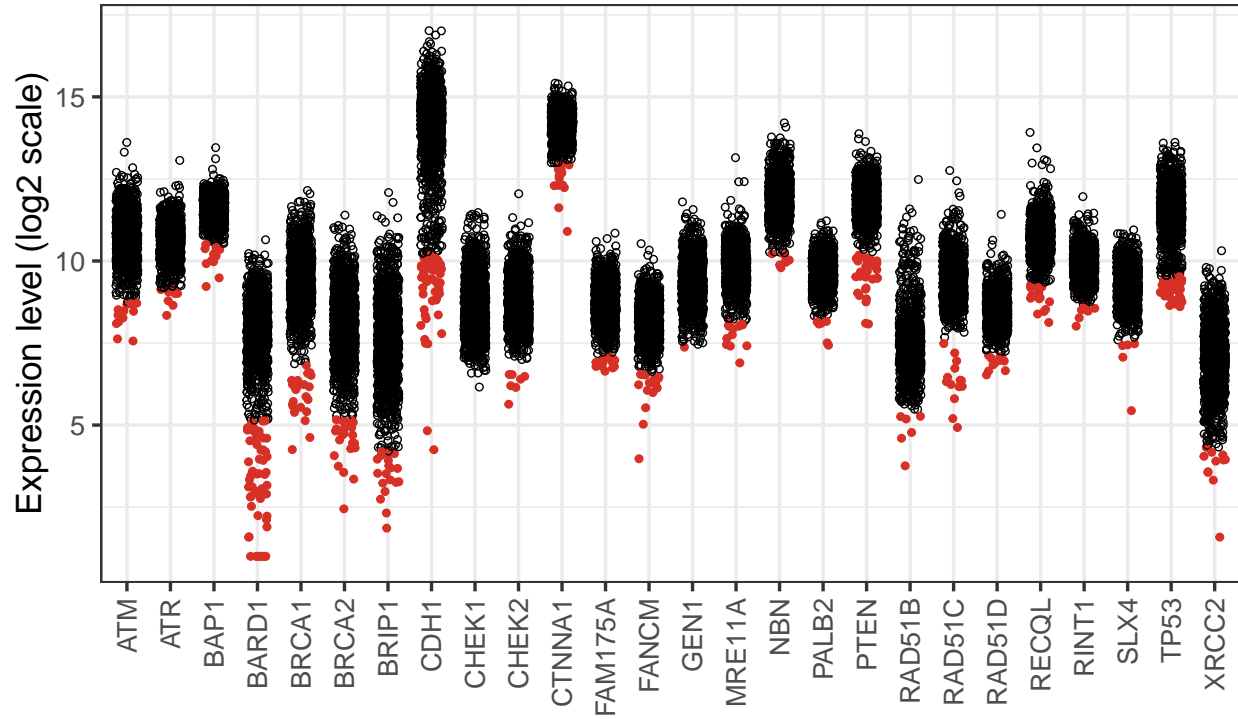

122 **Figure S23: Gene-expression levels for 26 cancer-predisposition genes, including *BRCA1* and *BRCA2*.** For each  
123 gene, we identified tumors that expressed these genes at relatively low levels compared to other breast tumors; these  
124 low expressors are highlighted as red points.

## Clinical characteristics

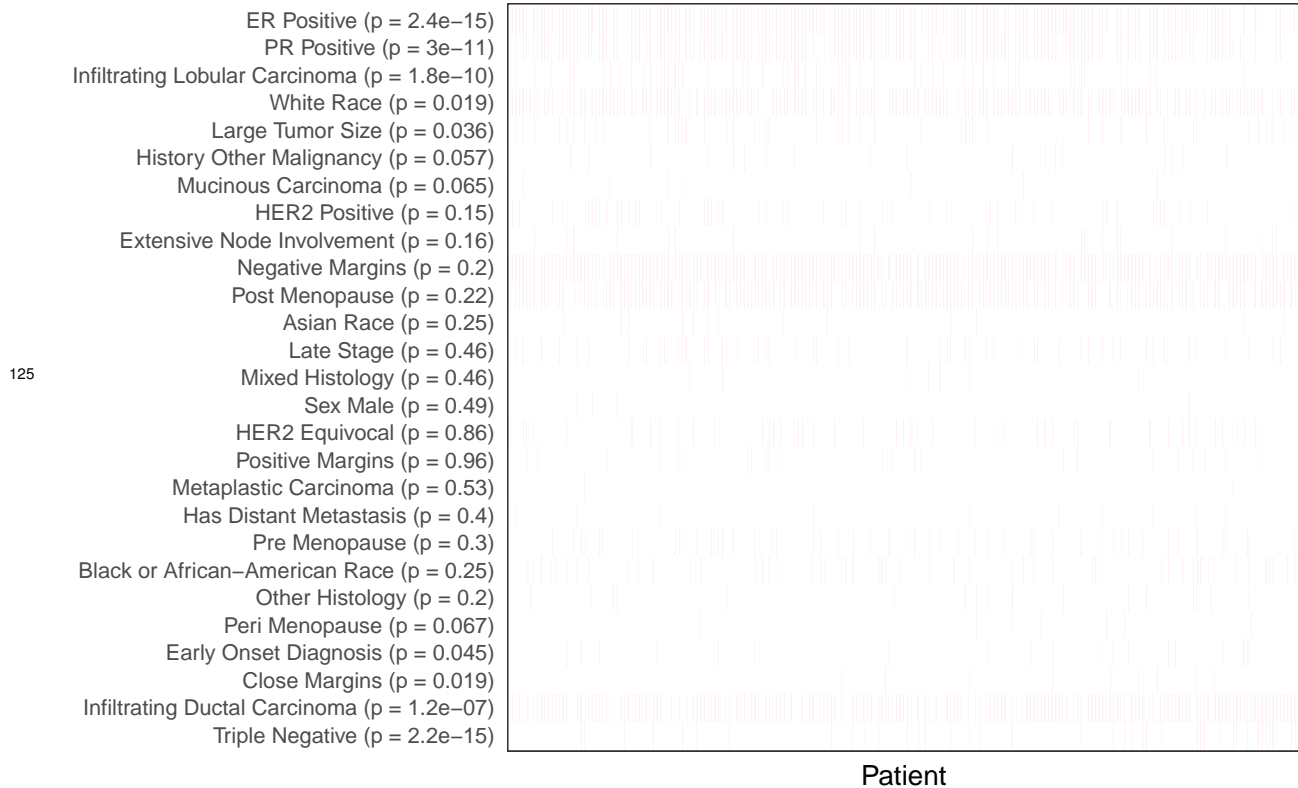

126 **Figure S24: Relationship between BRCA aberration status and demographic, histopathological, and surgical**  
 127 **observations in breast-cancer patients.** Tumors with triple-negative hormone receptors, infiltrating ductal carcinoma  
 128 histologies, or close surgical margins overlapped most with BRCA-aberrant tumors based on somatic-mutation  
 129 signatures.

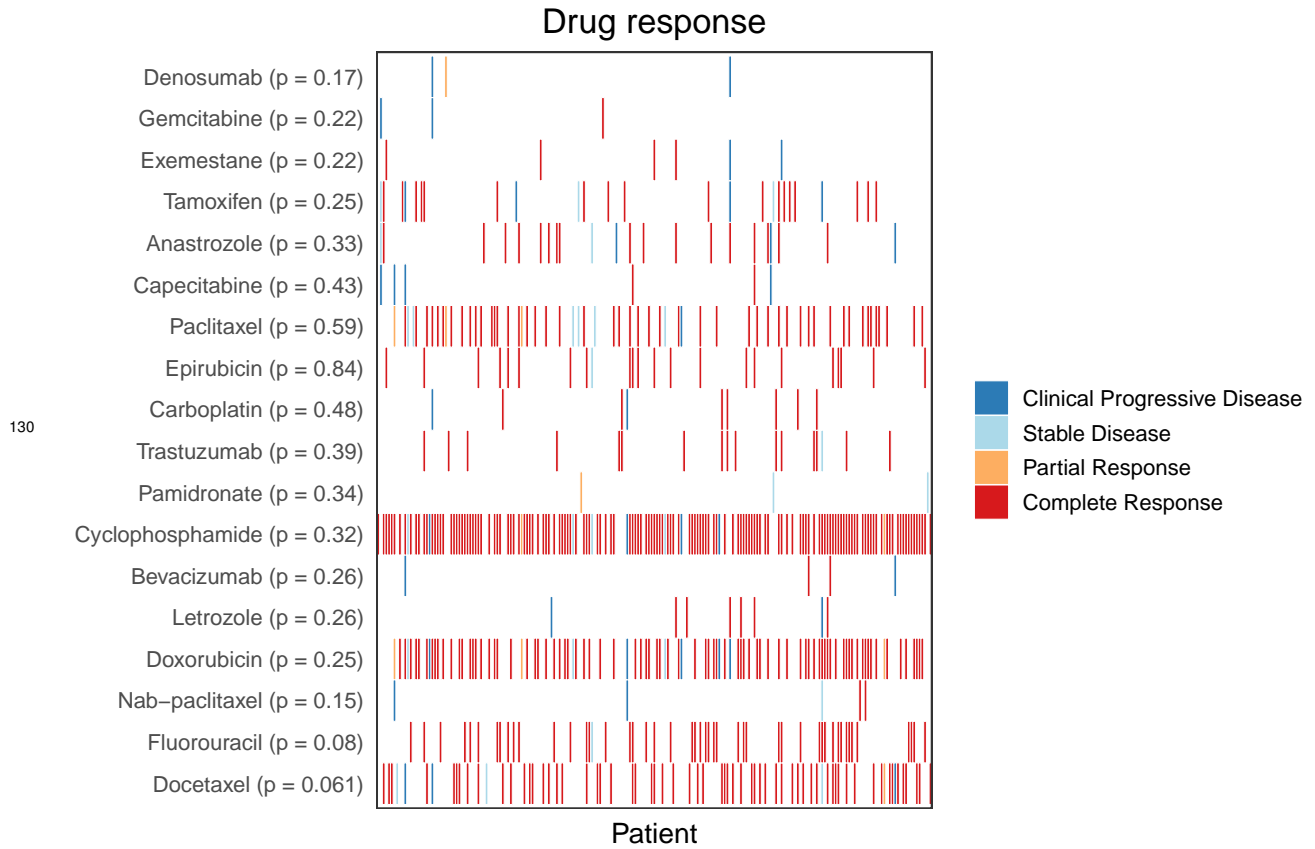

131 **Figure S25: Relationship between BRCA aberration status and pharmacological responses in breast-cancer**  
 132 **patients.** We evaluated clinical treatment responses for 211 TCGA patients for whom drug-response data were  
 133 available. Responses for none of the drugs were significantly correlated with BRCA aberration status based on
